1 Mammalian ANP32A and ANP32B  
2 proteins drive alternative avian influenza  
3 virus polymerase adaptations

4 Running title: ANP32B drives influenza PB2-E627K

5 Thomas. P. Peacock<sup>1</sup>, Carol M. Sheppard<sup>1</sup>, Ecco Staller<sup>1</sup>, Rebecca Frise<sup>1</sup>, Olivia C. Swann<sup>1</sup>,  
6 Daniel H. Goldhill<sup>1</sup>, Jason S. Long<sup>1,a</sup>, and Wendy S. Barclay<sup>1@</sup>

7 <sup>1</sup>Department of Infectious Diseases, Imperial College London, London, UK, W2 1PG

8 <sup>a</sup>current address – National Institute for Biological Standards and Control, Blanche Ln, South  
9 Mimms, Potters Bar, UK, EN6 3QG

10 @corresponding author; tel: +44 (0)20 7594 5035, email: [w.barclay@imperial.ac.uk](mailto:w.barclay@imperial.ac.uk)

11 ORCID ID:

12 T. P. Peacock - 0000-0001-7077-2928

13 C. M. Sheppard - 0000-0002-3285-3804

14 E. Staller - 0000-0002-8443-5559

15 R. Frise - 0000-0002-5522-623X

16 O.C. Swann – 0000-0002-0155-7818

17 D.H. Goldhill – 0000-0003-4597-5963

18 J. S. Long - 0000-0002-0251-6487

19 W. S. Barclay - 0000-0002-3948-0895

## 20 Abstract

21 ANP32 proteins, which act as influenza polymerase co-factors, vary between birds and  
22 mammals. The well-known mammalian adaptation, PB2-E627K, enables influenza polymerase  
23 to use mammalian ANP32 proteins. However, some mammalian-adapted influenza viruses do  
24 not harbour this adaptation. Here, we show that alternative PB2 adaptations, Q591R and  
25 D701N also allow influenza polymerase to use mammalian ANP32 proteins. PB2-E627K  
26 strongly favours use of mammalian ANP32B proteins, whereas D701N shows no such bias.  
27 Accordingly, PB2-E627K adaptation emerges in species with strong pro-viral ANP32B proteins,  
28 such as humans and mice, while D701N is more commonly seen in isolates from swine, dogs  
29 and horses where ANP32A proteins are more strongly pro-viral. In an experimental evolution  
30 approach, passage of avian viruses in human cells drives acquisition of PB2-E627K, but not  
31 when ANP32B is ablated. The strong pro-viral support of ANP32B for PB2-E627K maps to the  
32 LCAR region of ANP32B.

33 Keywords: Influenza / Polymerase / ANP32A / ANP32B / Adaptation

34

## 35 Introduction

36 The natural host reservoir of influenza A viruses is wild aquatic birds. To efficiently  
37 replicate in mammalian hosts, avian influenza viruses need to overcome multiple barriers by  
38 adapting to several mammalian host factors (Long, Mistry et al., 2019b). One major block to  
39 avian influenza virus replication in mammalian cells is the incompatibility of the viral  
40 polymerase with host acidic nuclear phosphoproteins of 32 kilodaltons (ANP32) proteins  
41 (Long, Giotis et al., 2016). ANP32 proteins are essential for influenza polymerase activity, and

42 adaptation to the ANP32 proteins of a new host is generally the first mutation seen during  
43 cross-species jumps (Long et al., 2019b, Staller, Sheppard et al., 2019, Sugiyama, Kawaguchi  
44 et al., 2015, Zhang, Zhang et al., 2019). Most avian species encode ANP32A proteins that are  
45 longer than the mammalian orthologues due to an exon duplication that results in a 33 amino  
46 acid insertion between the N-terminal leucine rich repeat (LRR) domain and the C-terminal  
47 low complexity acidic region (LCAR). Avian influenza virus polymerase is supported by this  
48 longer avian-specific isoform of ANP32A, but not the shorter mammalian form (Long et al.,  
49 2016).

50 Mutations in the heterotrimeric viral polymerase can enable efficient use of  
51 mammalian ANP32 proteins, the best characterised of which is PB2-E627K (Domingues, Eletto  
52 et al., 2019, Long et al., 2016, Subbarao, London et al., 1993). However, some non-human  
53 mammalian influenza viruses do not contain PB2-E627K and have achieved mammalian  
54 adaptation through different mutations, for example the swine-origin H1N1 2009 pandemic  
55 virus (pH1N1) has PB2 polymorphisms at positions 271, 590 and 591 which functionally  
56 compensate for the lack of E627K (Liu, Qiao et al., 2012, Mehle & Doudna, 2009).  
57 Furthermore, all equine influenza virus strains, Eurasian avian-like swine influenza viruses,  
58 and canine influenza viruses lack PB2-E627K, but contain an alternative adaptation, PB2-  
59 D701N, previously described as modulating mammalian importin binding (Gabriel, Klingel et  
60 al., 2011, Sediri, Schwalm et al., 2015).

61 As well as differences in avian and mammalian ANP32 length, there also exists  
62 differences in the level of redundancy to support influenza virus polymerase in different  
63 vertebrate hosts. ANP32A is the sole ANP32 family member that supports influenza  
64 polymerase in birds, while in humans and most other mammalian influenza hosts ANP32A

65 and ANP32B can both support polymerase activity to varying levels (Long, Idoko-Akoh et al.,  
66 2019a, Peacock, Swann et al., 2020, Staller et al., 2019, Zhang et al., 2019). One exception is  
67 mice in which only ANP32B can efficiently support influenza polymerase due to a  
68 polymorphism in murine ANP32A at position 130 – a residue critical for the interaction  
69 between ANP32 proteins and viral polymerase (Beck, Zickler et al., 2020, Staller et al., 2019,  
70 Zhang et al., 2019). It has recently been shown that, although both swine ANP32A and  
71 ANP32B can support mammalian-adapted polymerases, swine ANP32A has the more potent  
72 pro-viral function and can even partially support avian polymerases (Peacock et al., 2020,  
73 Zhang, Li et al., 2020). Similarly in horses, dogs, seals and bats, ANP32A appears to be a more  
74 potent pro-viral factor than ANP32B (Peacock et al., 2020).

75 In this study we aimed to understand whether the alternative mammalian PB2  
76 adaptations, other than PB2-E627K, function by adapting the polymerase to utilise  
77 mammalian ANP32 proteins, or whether they achieve adaptation through an ANP32-  
78 independent mechanism. We find that alongside PB2-E627K, -Q591R and -D701N specifically  
79 adapt avian polymerases to use mammalian ANP32 proteins. Furthermore, while PB2-D701N  
80 allows the polymerase to efficiently use both ANP32A and B proteins, -E627K specifically  
81 favours use of mammalian ANP32B proteins. In support of this finding we use bioinformatics  
82 to show that viruses adapting to hosts in which ANP32B is the more potent pro-viral factor,  
83 such as humans and mice, generally adapt via PB2-E627K while viruses that emerge in pigs,  
84 horses or dogs, hosts with potent pro-viral ANP32A proteins, more often gain PB2-D701N, or  
85 -Q591R. Using an experimental evolution approach we passaged a pair of avian influenza virus  
86 in human cells and observed the emergence of the PB2-E627K mutation. This adaptation was  
87 not seen during passage of the same avian virus in human cells lacking ANP32B (BKO), or in  
88 swine cells with a dominant ANP32A protein. Finally, we map the difference in ANP32B

89 preference of polymerases containing E627K to the ANP32B protein LCAR, the region that has  
90 recently been implied to directly interact with the 627 domain in the influenza  
91 polymerase/ANP32 co-structure (Camacho-Zarco, Kalayil et al., 2020).

## 92 Results

### 93 *PB2-Q591R, -E627K and -D701N specifically adapt avian influenza polymerases to* 94 *mammalian ANP32 proteins*

95 We previously described a library of mammalian PB2 adaptations in an avian influenza  
96 virus polymerase backbone A/turkey/England/50-92/1991(H5N1; 50-92) (Cauldwell,  
97 Moncorge et al., 2013). Here we expanded the library to include some additional mutants  
98 implicated in the literature as mammalian-adapting variants (Table 1). We tested the effect  
99 of each mutation on polymerase activity in wild-type (WT) human eHAP and chicken DF-1 cells  
100 (Figure 1). Consistent with our previous findings (Cauldwell et al., 2013), mutations displayed  
101 one of three phenotypes: i) no significant increase in human or avian cells (G590S - grey bars),  
102 ii) significantly increased polymerase activity in both human and avian cells (G158E, T271A,  
103 K702R and D740N – red bars), or iii) significantly increased polymerase activity only in human  
104 cells (Q591R, E627K/V and D701N – green bars). This implies that the third set of PB2 mutants  
105 work by adapting the polymerase to utilising a host factor that is different between  
106 mammalian and avian cells.

107 A range of host factors have been implicated in the mammalian adaptation of avian  
108 influenza virus polymerase including  $\alpha$ -importins, DDX17 and ANP32 proteins (reviewed in  
109 (Long et al., 2019b)). To investigate whether the PB2 mutations in our panel adapted  
110 polymerase to mammalian ANP32 proteins, we performed an ANP32 complementation assay  
111 in human cells lacking endogenous ANP32A and ANP32B (dKO) (Long et al., 2019a, Staller et

112 al., 2019). We tested the complementation of polymerase activity for each PB2 mutant with  
113 ANP32 proteins from chicken, human, swine, or dog (Figure 2A, Supplementary Figure S1).

114 As before the PB2 mutants displayed one of three phenotypes that corresponded with  
115 their phenotype in human or chicken cells described in Figure 1. Mutant group 1 were rescued  
116 by co-expression of chANP32A but not by expression of mammalian ANP32A or B, and gave  
117 patterns of polymerase activity largely identical to WT PB2 (Supplementary Figure S1A – grey  
118 bars), activity of group 2 mutants was significantly better than WT PB2 by co-expression of  
119 either chicken or mammalian ANP32 (Figure 2A – red bars), and group 3 mutants were only  
120 enhanced over WT in presence of mammalian ANP32 proteins (Figure 2A – green bars;  
121 Supplementary Figure S1A). This implies that the PB2 mutations at amino acids 591, 627 and  
122 701 all enhance polymerase activity in mammalian cells by specifically enabling  
123 complementation by mammalian ANP32 proteins.

124 We then considered whether any other host specific factors that differed between  
125 avian and mammalian cells might affect the complementation of influenza polymerase by  
126 ANP32 proteins. We reconstituted each polymerase containing different PB2 mutations in  
127 chicken DF-1 cells in which chANP32A expression was ablated by CRISPR editing (Long et al.,  
128 2019a), and then rescued polymerase activity by again co-expressing ANP32 proteins from  
129 chicken, human, swine or dog (Figure 2B, Supplementary Figure S1B). Overall, the pattern of  
130 complementation in chicken cells was consistent with that seen in human cells, suggesting  
131 that mammalian adapting polymerase mutations in PB2 enable mammalian ANP32 proteins  
132 to support polymerase activity even in chicken cells, and no other host factors that differ  
133 between avian and mammalian species are required for this phenotype. In either human and  
134 chicken cells lacking ANP32 proteins and complemented with chicken ANP32A, group 3 PB2

135 mutations Q591R, E627K, and D701N did give a small boost to polymerase activity, however  
136 this boost was far less than that seen for the group 2 mutants (Figure 2, Supplementary Figure  
137 1).

138 These results indicate that PB2 mutations Q591R and D701N, but not the other  
139 mutations tested here, act in a similar manner to E627K and enable viral polymerase to utilise  
140 mammalian ANP32 proteins as a co-factor.

141 *PB2-E627K, but not -D701N, adapts influenza virus polymerase for preferential*  
142 *complementation by mammalian ANP32B*

143 Across different mammalian species, there is variation in the ability of ANP32A or  
144 ANP32B to support influenza virus polymerase. For example, in humans and mice ANP32B is  
145 the more potent polymerase co-factor, whilst the ANP32A protein of pigs, horses, dogs, seals  
146 and bats more efficiently support polymerase activity (Supplementary Figure S2A,B)(Peacock  
147 et al., 2020, Zhang et al., 2019). This dominance is maintained across a range of different  
148 ratios of these proteins (Supplementary Figure S2C). These subtle variations are due to  
149 polymorphisms between the ANP32 orthologues in different species. For example, the potent  
150 pro-viral activity of swine ANP32A is due to polymorphisms at positions 106 and 156 (Peacock  
151 et al., 2020, Staller et al., 2019, Zhang et al., 2020). Similarly, the weak pro-viral activity of dog  
152 (as well as bat and seal) ANP32B is attributed to residue 153 that is glutamine in the human  
153 ANP32B, but arginine in the canine orthologue (Supplementary Figure S3A-C)

154 To further investigate the compatibility between different polymerase constellations  
155 and different mammalian ANP proteins, polymerase reconstituted with PB2 mutants from  
156 group 3 were tested to see if they displayed any bias in ANP32 paralogue usage (Figure 3).  
157 The relative efficacy of each ANP32 protein to support polymerase varied depending on the

158 nature of adaptive mutation in PB2. For polymerase bearing PB2-D701N, human ANP32B was  
159 superior to human ANP32A, whereas swine ANP32A was more supportive than ANP32B and  
160 canine ANP32B was poorly supportive. In contrast, for polymerase bearing E627K both human  
161 and swine ANP32B were more potent than their respective ANP32A counterparts. Moreover,  
162 E627K polymerase was also somewhat supported by canine ANP32B, which is very poorly  
163 used by most polymerases (Supplementary Figure S2A)(Peacock et al., 2020). PB2-E627K was  
164 more highly supported by human ANP32B than ANP32A over a wide range of plasmid  
165 concentrations (Supplementary Figure 4). For polymerase bearing PB2-Q591R the pattern  
166 was intermediate: little difference was seen in swine ANP32 preference while human ANP32B  
167 was significantly preferred over ANP32A and dog ANP32B was ineffective as a proviral factor.  
168 These effects were observable in ANP32 complementation assays in both human and chicken  
169 cells (Figure 3, Supplementary Figure S5).

170         These data illustrate a bias of different PB2 polymerase adaptations for different  
171 mammalian ANP32A or B proteins that is particularly evident for PB2-E627K, and to a lesser  
172 extent, -Q591R, which show a preference for ANP32B proteins.

### 173 *Species with strongly proviral ANP32B proteins drive the acquisition of PB2-E627K*

174         Although PB2-E627K is the key polymerase adaptation in human seasonal influenza  
175 virus and commonly found in human zoonotic infections as well as in laboratory-adapted  
176 mouse-passaged avian influenza viruses, it is rarely found in viruses that have crossed from  
177 birds into swine, dogs or horses (Liu et al., 2012, Lloren, Lee et al., 2017). Instead, viruses  
178 endemic in those species tend to harbour the other ANP32-specific mammalian adaptations,  
179 PB2-Q591R and -D701N. We therefore hypothesised that in humans, PB2-E627K might evolve  
180 as a specific adaptation to the strongly proviral ANP32B. Conversely for other mammalian



181 species such as dogs and horses, the selective pressure exerted by ANP32B would be weaker  
182 and adaptation would likely occur by PB2-D701N.

183 To test this hypothesis, we first performed bioinformatics analysis comparing the  
184 number of mammalian adaptations found at sites 591, 627 and 701 during zoonotic infections,  
185 laboratory mouse adaptation studies, or sustained transmission of avian-origin PB2 segments  
186 in different mammalian species (Figure 4A). Avian influenza viruses strongly selected for PB2-  
187 E627K during both human zoonotic events and mouse experimental adaptation, although  
188 other ANP32-specific mutations were also represented, such as PB2-D701N. Incursions of  
189 avian influenza viruses into pigs rarely showed adaptation at any of these three sites (Figure  
190 4A, right panel). This might be explained by the observation that swine ANP32A is somewhat  
191 supportive of non-adapted avian influenza virus polymerases (Peacock et al., 2020, Zhang et  
192 al., 2020). It is also noteworthy that the number of viruses with multiple ANP32-specific PB2  
193 adaptations simultaneously is very low, suggesting these mutations are partially redundant  
194 (although the more poorly adaptive Q591R/K and D701N mutations were occasionally found  
195 together).

196 In viruses that have crossed from birds and sustainably circulated in mammalian hosts  
197 we saw a clear difference in PB2 adaptations in humans, compared to viruses endemic in  
198 swine, horses and dogs. The only sustained avian-origin PB2 in humans (which transmitted  
199 during the 1918 Spanish influenza pandemic) has E627K, whereas none of the polymerases  
200 from viruses adapted in other species show this adaptation. Instead such viruses contain a  
201 mixture of D701N and Q591R/K/L or (in the case of canine H3N2 viruses) none of the currently  
202 described mammalian ANP32-specific adaptations (Figure 4B).

203 *Experimental evolution of an avian influenza virus in human cells shows expression of*  
204 *ANP32B leads to PB2-E627K*

205 To investigate whether different ANP32 proteins drive different PB2 adapting  
206 mutations, we used an experimental evolution approach, serially passaging an avian influenza  
207 virus through human cell lines lacking either ANP32A (AKO) or ANP32B (BKO) (Staller et al.,  
208 2019).

209 Six populations of avian influenza virus 50-92 were passaged 10 times through either  
210 control cells (which express both ANP32A and ANP32B), or cells that express ANP32B only  
211 (AKO) or ANP32A only (BKO). PB2 segments from each population were Sanger sequenced at  
212 passages 2, 5 and 10. By passage 5, in both the control and AKO cells, three out of six (50%)  
213 of the populations had evolved PB2-E627K. This adaptation was not detected in the BKO cells,  
214 even by passage 10. Instead in these cells one virus population (17%) at passage 5, and two  
215 by passage 10 (33%), gained the D701N mutation (Figure 5A). D701N was also seen in one or  
216 two populations in WT or AKO cells by passage 10, respectively.

217 To confirm this phenotype was not specific to a single strain of avian influenza, this  
218 experiment was repeated with an H7N9 virus, A/Anhui/1/2013 (Anhui). The Anhui isolate had  
219 naturally gained PB2-E627K during zoonosis but this was reverted to 627E by reverse genetics  
220 for the purpose of the passage experiment. In a similar manner to the H5N1 50-92 virus, the  
221 Anhui PB2 gene gained a mixture of E627K, D701N, as well as Q591K, in the control cells or  
222 AKO cells by passage 5, whereas in the BKO cells every population evolved D701N or Q591K  
223 but E627K was not detected (Figure 5B).

224 The same pair of avian influenza viruses were also passaged in swine origin NPTr cells.  
225 In stark contrast to the human cells, no ANP32 adaptations were seen after 5 passages in the

226 swine NPTr cells (Figure 5C,D). Taken together, these observations suggest that the  
227 predominance for the PB2-E627K adaptive mutation seen in human cells is driven by  
228 adaptation to utilise human ANP32B.

229 *The PB2-E627K preference for human ANP32B maps to the LCAR domain of the protein.*

230 To investigate the molecular basis of the superior ability of human ANP32B over  
231 ANP32A to complement mammalian-adapted PB2-E627K polymerase, we generated human  
232 ANP32A/B chimeric ANP32 constructs. As the LCAR is described as directly interacting with  
233 the 627 domain of PB2 (Camacho-Zarco et al., 2020, Mistry, Long et al., 2019), we switched  
234 the LCAR between human ANP32A and B (from amino acid 161 to the C-terminus, red  
235 highlight - Figure 6A). Human ANP32A with the ANP32B LCAR was much more efficient at  
236 rescuing PB2-E627K polymerase activity than WT human ANP32A, while conversely  
237 introducing the ANP32A LCAR onto human ANP32B reduced its capacity to support  
238 polymerase activity despite robust expression of the chimeric proteins (Figure 6B, C). This  
239 pattern held true for a pair of unrelated H1N1 and H5N1 avian-origin polymerases tested  
240 (Figure 6B). This suggests that the preference for ANP32B shown by PB2-E627K polymerase  
241 maps to amino acid differences in the ANP32 LCAR domain and provides further evidence that  
242 this ANP32 domain likely directly interacts with the PB2 627/NLS domain.

## 243 Discussion

244 In this study we showed that several different mutations in PB2 avian-origin influenza  
245 polymerases to use the shorter ANP32 proteins found in mammalian cells but that the most  
246 well-known of these PB2-E627K, strongly biases polymerases towards reliance on mammalian  
247 ANP32B. While ANP32A and ANP32B serve redundant proviral roles in many mammals,  
248 ANP32B is the dominant proviral factor in humans and mice whereas in most other relevant

249 mammalian hosts, such as pigs, horses and dogs, ANP32A proteins is the more potent  
250 (Peacock et al., 2020, Staller et al., 2019, Zhang et al., 2020, Zhang et al., 2019). This pattern  
251 shapes the adaptive evolution of avian viruses in these different mammalian hosts. Thus,  
252 adaptation in humans and mice tends to strongly select for PB2-E627K while pigs, dogs and  
253 horses tend to select for PB2-D701N, or Q591R/K. This was borne out in an experimental  
254 evolution study where WT human cells, or those lacking ANP32A drove viruses to gain PB2-  
255 E627K, whereas viruses passaged through cells lacking ANP32B did not acquire that mutation.  
256 Finally we find that the strong preference for ANP32B proteins granted by PB2-E627K is due  
257 to differences between ANP32A and ANP32B sequence in the LCAR region of these proteins,  
258 a region implicated with direct interaction with the PB2 627 and NLS domains (Camacho-Zarco  
259 et al., 2020, Mistry et al., 2019). Overall these data suggest that the evolutionary ecology of  
260 influenza virus polymerase differs in different species due to differences in mammalian ANP32  
261 proteins (Figure 7).

262 Previous studies have shown that varying expression of ANP32A isoforms in different  
263 avian species result in a different propensity to drive mammalian-like polymerase adaptations  
264 (e.g. PB2-E627K)(Baker, Ledwith et al., 2018, Domingues et al., 2019). Our work further  
265 expands on this concept that the pattern of ANP32 expression in a species can influence virus  
266 evolution. This finding may have implications for the relative risk of zoonotic or pandemic  
267 viruses emerging from different species; for example, although humans are often exposed to  
268 equine and canine hosts there is a lack of evidence for zoonotic influenza infections  
269 originating from these species, although mismatched HA receptor binding preference is also  
270 likely to contribute to this interspecies block (Collins, Vachieri et al., 2014).

271 Surprisingly, we found that PB2-D701N was an efficient adaptation to short  
272 mammalian ANP32 family members, regardless of whether this assay was undertaken in  
273 human or chicken cells. Previously PB2-D701N has been implicated as an adaptation to a  
274 different set of host factors, the importin- $\alpha$  family (Gabriel et al., 2011, Sediri et al., 2015).  
275 Our results from avian cells would imply that importin- $\alpha$  adaptation is not the only phenotype  
276 of this mutation, since, in the presence of chicken importins, polymerases reconstituted with  
277 this mutation were efficiently supported by mammalian ANP32 proteins.

278 Influenza virus polymerases co-opt a range of host factors for their replication and  
279 transcription (Peacock, Sheppard et al., 2019). Our approach of using human and avian cells  
280 lacking pro-viral ANP32 family members has potential as a powerful screening method for  
281 investigating, less well-defined mammalian ANP32 adaptations, and to discover novel host  
282 factors that affect polymerase activity including proviral and restriction factors in human cells  
283 (Mehle & Doudna, 2008). Future work should further map the sequences in the ANP32B LCAR  
284 that direct the evolution of the PB2-E627K mutations and attempt to understand the  
285 preference for different PB2 adaptations driven by ANP32A or B from a structural perspective.

## 286 **Materials and methods**

### 287 *Cells*

288 Human engineered-Haploid cells (eHAP; Horizon Discovery) without gene knockout  
289 (Control) or with ANP32A (AKO), ANP32B (BKO), or with both knocked out (dKO) by CRISPR-  
290 Cas9, as described previously (Staller et al., 2019), were maintained in Iscove's Modified  
291 Dulbecco's Medium (IMDM; ThermoFisher) supplemented with 10% foetal bovine serum  
292 (FBS; Biosera), 1% non-essential amino acids (NEAA; Gibco) and 1% Penicillin-streptomycin  
293 (pen-strep; invitrogen). Human embryonic kidney (293Ts, ATCC), Madin-Darby canine kidney

294 cells (MDCK, ATCC) and swine Newborn Pig Trachea cells (NPTr; ATCC), were maintained in  
295 Dulbecco's Modified Eagle Medium (DMEM) supplemented with 10% FBS, 1% NEAA and 1%  
296 pen-strep. Chicken fibroblast (DF-1; ATCC) were maintained in DMEM supplemented with  
297 10% FBS, 5% tryptose phosphate broth (Sigma), 1% NEAA and 1% pen-strep. All mammalian  
298 cells were maintained at 37°C, 5% CO<sub>2</sub> while DF1s were maintained at 39°C, 5% CO<sub>2</sub>.

### 299 *Plasmid constructs*

300 Viruses and virus minigenome full strain names used through this study were  
301 A/duck/Bavaria/1/1977(H1N1, Bavaria), A/turkey/England/50-92/1992(H5N1; 50-92),  
302 A/Anhui/1/2013(H7N9; Anhui), A/England/687/2010(pH1N1), A/Victoria/1975(H3N2), and  
303 A/swine/England/453/2006(H1N1). Viral minigenome expression plasmids were either  
304 generated previously or made using overlap extension PCR (Cauldwell et al., 2013, Elderfield,  
305 Watson et al., 2014, Moncorge, Long et al., 2013). ANP32 expression constructs were made  
306 as previously described or generated using overlap extension PCR (Long et al., 2016, Peacock  
307 et al., 2020, Staller et al., 2019).

### 308 *Virus strains*

309 All virus work in this study was performed with A/turkey/England/50-92/1992(H5N1;  
310 50-92) or A/Anhui/1/2013(H7N9) [K627E], reassortant viruses was generated by rescuing the  
311 polymerase, NP and NS segments of the homologous virus with the HA, NA and M segments  
312 of A/Puerto Rico/1/1934(H1N1; PR8) as previously described (Long, Howard et al., 2013).  
313 Virus was titred by plaque assay on MDCKs. Virus PB2s were sequenced to confirm no prior  
314 mammalian adaptation was acquired during rescue or propagation. Infections were carried  
315 out at 37°C in relevant virus-containing serum-free media (DMEM or IMDM, 1% NEAA, 1%  
316 P/S). 1 hour after infection media was changed to serum-free media supplemented with

317 1µg/ml tosyl phenylalanyl chloromethyl ketone (TPCK)-treated trypsin (Worthington-  
318 Biochemical). Passage experiments were performed by infecting cells at an MOI of 0.01, 48  
319 hours after inoculation viruses were harvested and prepared for the next passage.

### 320 *Minigenome assay*

321 eHAP dKO cells were transfected at around 50% confluence in 24 well plates using  
322 lipofectamine® 3000 (thermo fisher) with the following mixture of plasmids; 100ng of pCAGGs  
323 ANP32 or empty pCAGGs, 40ng of pCAGGs PB2, 40ng of pCAGGs PB1, 20ng of pCAGGs PA,  
324 80ng of pCAGGs NP, 40ng of pCAGGs Renilla luciferase, 40ng of poll vRNA-Firefly luciferase.  
325 DF-1 AKO cells were transfected in 12 well plates using double the amount of plasmid in eHAP  
326 cells and poll vRNA-firefly plasmids with a chicken poll site described previously (Moncorge,  
327 Mura et al., 2010). 24 hours post-transfection cells were lysed in passive lysis buffer  
328 (Promega) and luciferase bio-luminescent signals were read on a FLUOstar Omega plate  
329 reader (BMG Labtech) using the Dual-Luciferase® Reporter Assay System (Promega). Firefly  
330 signal was normalised to *Renilla* signal to give relative luminescence units (RLU). All assays were  
331 performed on a minimum of two separate occasions with representative data shown.

### 332 *Western Blotting*

333 To visualise protein expression during mini-genome assays, around 500,000  
334 transfected cells were lysed in RIPA buffer (150mM NaCl, 1% NP-40, 0.5% Sodium  
335 deoxycholate, 0.1% SDS, 50mM TRIS, pH 7.4) supplemented with an EDTA-free protease  
336 inhibitor cocktail tablet (Roche).

337 Proteins were detected with mouse α-FLAG (F1804, Sigma), rabbit α-Vinculin  
338 (AB129002, Abcam), rabbit α-PB2 (GTX125926, GeneTex) and mouse α-NP ([C43] ab128193,  
339 Abcam). The following near infrared (NIR) fluorescently tagged secondary antibodies were

340 used: IRDye® 680RD Goat Anti-Rabbit (IgG) secondary antibody (Ab216777, Abcam) and  
341 IRDye® 800CW Goat Anti-Mouse (IgG) secondary antibody (Ab216772, Abcam). Western Blots  
342 were visualised using an Odyssey Imaging System (LI-COR Biosciences).

### 343 *Experimental virus evolution*

344 At each passage 1000 pfu of avian influenza virus was inoculated in serum-free media  
345 into confluent monolayers seeded in 6 well plates. After 1 hour, media was replaced with  
346 serum-free media with 1ug/ml of TPCK trypsin. 48 hours post-infection the supernatant was  
347 harvested, spun down to remove cellular debris and used for further passages. Samples were  
348 sequenced (where appropriate), and frozen down and stored at -80°C. Each passage  
349 experiment was done with 6 concurrent populations.

### 350 *Virus sequencing*

351 To sequence viruses, RNA was extracted from cell-free virus-containing supernatants  
352 using the viral RNA extraction mini kit (Qiagen). cDNA synthesis was conducted using  
353 Superscript IV and the uni12-FluG primer (AGCGAAAGCAGG). Sequencing of PB2s were  
354 performed using two sets of primers with 5'-M13F or M13R primer sites  
355 (TGTA AACGACGGCCAGTCCACTGTGGACCATATGGCC with  
356 CAGGAAACAGCTATGACCTGGAATATTCATCCACTCCC, and  
357 TGTA AACGACGGCCAGTGGGAGTGGATGAATATTCCAG with  
358 CAGGAAACAGCTATGACCGCTGTCTGGCTGTCAGTAAGTATGC). PA was sequenced similarly  
359 (TGTA AACGACGGCCAGTGGGACAATGCTTCAATCCAATG with  
360 CAGGAAACAGCTATGACCCTTCTCATACTTGCAATGTGCTC, and  
361 TGTA AACGACGGCCAGTGGGCACTCGGTGAGAACATGGC with  
362 CAGGAAACAGCTATGACAACTATTTTCAGTGCATGTG). PCR was performed using KOD Hot Start



363 DNA polymerase (Merck). PCR products were purified using the Monarch PCR and DNA  
364 Cleanup Kit (NEB) and sequenced using the Sanger method with M13F or M13R primers.

### 365 *Bioinformatics analysis and literature review*

366 To assess the proportion zoonotic influenza viruses with different mammalian ANP32  
367 adaptations the PB2 sequences of all non-H1, -H2 and -H3 human or swine influenza viruses  
368 were downloaded from the NCBI influenza virus database and aligned. Sequences that were  
369 determined to be of seasonal human influenza origin were identified by BLASTn and removed  
370 and proportions of viruses with adaptation at position 591, 627 and 701 were calculated. For  
371 the mouse adaptation summary, an exhaustive literature search was undertaken for any  
372 study taking an avian-origin virus without any prior mammalian adaptation and passaging it  
373 through mice in pubmed using the search terms “mouse”, “influenza” and either  
374 “adaptation”, “adaption” or “passage”. A list of the papers identified and included in this  
375 analysis is included in supplementary table S1.

376 For the timeline of stably circulating avian-origin mammalian influenza virus strains –  
377 viruses were chosen due to the strength of the evidence that they came directly from birds  
378 into said species and not from another mammalian species – hence why pH1N1 swine-origin  
379 H1N1 and equine-origin canine H3N8 are excluded. Swine H9N2 was selected to be included  
380 as there remains fairly good evidence that, although this virus may have continued to co-  
381 circulate between poultry and pigs, it does show several mammalian adaptations and  
382 therefore probably constituted a swine-adapted avian-origin virus.

### 383 *Safety and Biosafety*

384 All studies of infectious agents were conducted within biosafety level 2 facilities  
385 approved by the UK Health and Safety Executive and in accordance with local rules at Imperial  
386 College London.

### 387 *Data availability*

388 This manuscript contains no data deposited in external repositories.

### 389 **Acknowledgements and funding**

390 The authors would like to thank members of the Barclay lab of Imperial College London  
391 for their scientific input, advice, and support for this project.

392 T.P.P. was supported by BBSRC grant BB/R013071/1; C.M.S, D.H.G. and W.S.B were  
393 supported by Wellcome Trust grant 205100; E.S. was supported by an Imperial College  
394 President's Scholarship; R.F. was supported by Wellcome Trust grant 200187; O.C.S. was  
395 supported by a Wellcome Trust studentship. J.S.L. and W.S.B were supported by BBSRC grant  
396 BB/K002465/1; W.S.B was supported by BBSRC grant BB/S008292/1.

### 397 **Author Contributions**

398 TPP and WSB conceived this study. TPP, CMS, ES, RF, OCS performed the experiments.  
399 TPP and DHG performed data curation and analysis. JSL and WSB acquired funding for the  
400 study. TPP and WSB wrote the manuscript. TPP, CMS, ES, OCS, DHG, JSL and WSB reviewed  
401 and edited the paper.

### 402 **Conflict of interest**

403 The authors declare that they have no conflict of interest.

## 404 References

- 405 Baker SF, Ledwith MP, Mehle A (2018) Differential Splicing of ANP32A in Birds Alters Its Ability to  
406 Stimulate RNA Synthesis by Restricted Influenza Polymerase. *Cell Rep* 24: 2581-2588 e4
- 407 Beck S, Zickler M, Pinho dos Reis V, Günther T, Grundhoff A, Reilly PT, Mak TW, Stanelle-Bertram S,  
408 Gabriel G (2020) ANP32B Deficiency Protects Mice From Lethal Influenza A Virus Challenge by  
409 Dampening the Host Immune Response. *Frontiers in Immunology* 11: 450
- 410 Camacho-Zarco AR, Kalayil S, Maurin D, Salvi N, Delaforge E, Milles S, Jensen MR, Hart DJ, Cusack S,  
411 Blackledge M (2020) Molecular basis of host-adaptation interactions between influenza virus  
412 polymerase PB2 subunit and ANP32A. *Nature Communications* 11: 3656
- 413 Cauldwell AV, Moncorge O, Barclay WS (2013) Unstable polymerase-nucleoprotein interaction is not  
414 responsible for avian influenza virus polymerase restriction in human cells. *J Virol* 87: 1278-84
- 415 Collins PJ, Vachieri SG, Haire LF, Ogradowicz RW, Martin SR, Walker PA, Xiong X, Gamblin SJ, Skehel JJ  
416 (2014) Recent evolution of equine influenza and the origin of canine influenza. *Proc Natl Acad Sci U S*  
417 *A* 111: 11175-80
- 418 Domingues P, Eletto D, Magnus C, Turkington HL, Schmutz S, Zagordi O, Lenk M, Beer M, Stertz S, Hale  
419 BG (2019) Profiling host ANP32A splicing landscapes to predict influenza A virus polymerase  
420 adaptation. *Nat Commun* 10: 3396
- 421 Elderfield RA, Watson SJ, Godlee A, Adamson WE, Thompson CI, Dunning J, Fernandez-Alonso M,  
422 Blumenkrantz D, Hussell T, Investigators M, Zambon M, Openshaw P, Kellam P, Barclay WS (2014)  
423 Accumulation of human-adapting mutations during circulation of A(H1N1)pdm09 influenza virus in  
424 humans in the United Kingdom. *J Virol* 88: 13269-83
- 425 Gabriel G, Klingel K, Otte A, Thiele S, Hudjetz B, Arman-Kalcek G, Sauter M, Shmidt T, Rother F,  
426 Baumgarte S, Keiner B, Hartmann E, Bader M, Brownlee GG, Fodor E, Klenk HD (2011) Differential use  
427 of importin-alpha isoforms governs cell tropism and host adaptation of influenza virus. *Nat Commun*  
428 2: 156
- 429 Liu Q, Qiao C, Marjuki H, Bawa B, Ma J, Guillosoy S, Webby RJ, Richt JA, Ma W (2012) Combination of  
430 PB2 271A and SR polymorphism at positions 590/591 is critical for viral replication and virulence of  
431 swine influenza virus in cultured cells and in vivo. *J Virol* 86: 1233-7
- 432 Lloren KKS, Lee T, Kwon JJ, Song MS (2017) Molecular Markers for Interspecies Transmission of Avian  
433 Influenza Viruses in Mammalian Hosts. *Int J Mol Sci* 18
- 434 Long JS, Giotis ES, Moncorge O, Frise R, Mistry B, James J, Morisson M, Iqbal M, Vignal A, Skinner MA,  
435 Barclay WS (2016) Species difference in ANP32A underlies influenza A virus polymerase host  
436 restriction. *Nature* 529: 101-4
- 437 Long JS, Howard WA, Nunez A, Moncorge O, Lycett S, Banks J, Barclay WS (2013) The effect of the PB2  
438 mutation 627K on highly pathogenic H5N1 avian influenza virus is dependent on the virus lineage. *J*  
439 *Virol* 87: 9983-96
- 440 Long JS, Idoko-Akoh A, Mistry B, Goldhill D, Staller E, Schreyer J, Ross C, Goodbourn S, Shelton H,  
441 Skinner MA, Sang H, McGrew MJ, Barclay W (2019a) Species specific differences in use of ANP32  
442 proteins by influenza A virus. *Elife* 8
- 443 Long JS, Mistry B, Haslam SM, Barclay WS (2019b) Host and viral determinants of influenza A virus  
444 species specificity. *Nat Rev Microbiol* 17: 67-81
- 445 Mehle A, Doudna JA (2008) An inhibitory activity in human cells restricts the function of an avian-like  
446 influenza virus polymerase. *Cell Host Microbe* 4: 111-22
- 447 Mehle A, Doudna JA (2009) Adaptive strategies of the influenza virus polymerase for replication in  
448 humans. *Proc Natl Acad Sci U S A* 106: 21312-6
- 449 Mistry B, Long JS, Schreyer J, Staller E, Sanchez-David RY, Barclay WS (2019) Elucidating the  
450 interactions between influenza virus polymerase and host factor ANP32A. *J Virol*
- 451 Moncorge O, Long JS, Cauldwell AV, Zhou H, Lycett SJ, Barclay WS (2013) Investigation of influenza  
452 virus polymerase activity in pig cells. *J Virol* 87: 384-94

453 Moncorge O, Mura M, Barclay WS (2010) Evidence for avian and human host cell factors that affect  
454 the activity of influenza virus polymerase. *Journal of virology* 84: 9978-86  
455 Peacock TP, Sheppard CM, Staller E, Barclay WS (2019) Host Determinants of Influenza RNA Synthesis.  
456 *Annu Rev Virol* 6: 215-233  
457 Peacock TP, Swann OC, Salvesen HA, Staller E, Leung PB, Goldhill DH, Zhou H, Lilloco SG, Whitelaw CBA,  
458 Long JS, Barclay WS (2020) Swine ANP32A supports avian influenza virus polymerase. *Journal of*  
459 *Virology*: JVI.00132-20  
460 Sediri H, Schwalm F, Gabriel G, Klenk HD (2015) Adaptive mutation PB2 D701N promotes nuclear  
461 import of influenza vRNPs in mammalian cells. *Eur J Cell Biol* 94: 368-74  
462 Staller E, Sheppard CM, Neasham PJ, Mistry B, Peacock TP, Goldhill DH, Long JS, Barclay WS (2019)  
463 ANP32 proteins are essential for influenza virus replication in human cells. *J Virol*  
464 Subbarao EK, London W, Murphy BR (1993) A single amino acid in the PB2 gene of influenza A virus is  
465 a determinant of host range. *J Virol* 67: 1761-4  
466 Sugiyama K, Kawaguchi A, Okuwaki M, Nagata K (2015) pp32 and APRIL are host cell-derived regulators  
467 of influenza virus RNA synthesis from cRNA. *Elife* 4  
468 Zhang H, Li H, Wang W, Wang Y, Han GZ, Chen H, Wang X (2020) A unique feature of swine ANP32A  
469 provides susceptibility to avian influenza virus infection in pigs. *PLoS Pathog* 16: e1008330  
470 Zhang H, Zhang Z, Wang Y, Wang M, Wang X, Zhang X, Ji S, Du C, Chen H, Wang X (2019) Fundamental  
471 Contribution and Host Range Determination of ANP32A and ANP32B in Influenza A Virus Polymerase  
472 Activity. *J Virol* 93

473

## 474 Tables

| Mutation | Group   | Impact                                              |
|----------|---------|-----------------------------------------------------|
| G158E    | Group 2 | Non species-specific polymerase activity boost      |
| T271A    | Group 2 | Non species-specific polymerase activity boost      |
| G590S    | Group 1 | Little or no effect alone                           |
| Q591R    | Group 3 | Mammalian ANP32-specific adaptation (non-biased)    |
| E627K    | Group 3 | Mammalian ANP32-specific adaptation (ANP32B-biased) |
| E627V    | Group 3 | Mammalian ANP32-specific adaptation (ANP32B-biased) |
| D701N    | Group 3 | Mammalian ANP32-specific adaptation (non-biased)    |
| K702R    | Group 2 | Non species-specific polymerase activity boost      |
| D740N    | Group 2 | Non species-specific polymerase activity boost      |

475 **Table 1. Summary table of PB2 mutants used in this study and effect shown by mutants with**  
476 **ANP32 proteins**

477

## 478 Figure legends

479 **Figure 1. PB2-G158E, T271A, K702R and D740N increase polymerase activity in a non-**  
480 **mammalian specific manner.**

481 Minigenome assays performed in WT human eHAP cells or WT chicken DF-1 cells with avian  
482 50-92 polymerase with different mammalian adaptations. Data throughout indicates  
483 triplicate repeats plotted as the mean and standard deviation, normalised to PB2 WT.  
484 Statistical significance was determined by one-way ANOVA with multiple comparisons against  
485 WT on log-transformed data. Lognormality of data was confirmed by Shapiro-Wilk test of  
486 normality. \*,  $0.05 \geq P > 0.01$ ; \*\*,  $0.01 \geq P > 0.001$ ; \*\*\*,  $0.001 \geq P > 0.0001$ ; \*\*\*\*,  $P \leq 0.0001$ .

487 **Figure 2. PB2-Q591R, -E627K and -D701N specifically adapt influenza virus polymerase to**  
488 **human ANP32 proteins.**

489 Minigenome assays performed in (A) human eHAP dKO cells or (B) chicken DF-1 AKO cells  
490 with avian 50-92 polymerase with different mammalian adaptations transfected in along with  
491 different chicken or human ANP32 proteins. Data throughout indicates triplicate repeats  
492 plotted as the mean and standard deviation, normalised to PB2 WT. Statistical significance  
493 was determined by one-way ANOVA with multiple comparisons against WT on log-transformed  
494 data. Lognormality of data was confirmed by Shapiro-Wilk test of normality. \*,  $0.05 \geq P > 0.01$ ;  
495 \*\*,  $0.01 \geq P > 0.001$ ; \*\*\*,  $0.001 \geq P > 0.0001$ ; \*\*\*\*,  $P \leq 0.0001$ .

496 **Figure 3. PB2-E627K shows a greater preference than -Q591R or -D701N for using**  
497 **mammalian ANP32B proteins.**

498 Data from Figure 1 and Supplementary Figure S1 shown in a different format. Minigenome  
499 assays performed in human eHAP dKO cells with avian 50-92 polymerase with different  
500 mammalian adaptations transfected in along with different avian or mammalian ANP32A  
501 (blue bars) or ANP32B proteins (orange bars). Data throughout indicates triplicate repeats  
502 plotted as the mean and standard deviation, normalised to chicken ANP32A. Statistical  
503 significance was determined by one-way ANOVA with multiple comparisons, statistical tests  
504 without comparison bars indicate a comparison against empty vector and between ANP32A  
505 and ANP32B proteins from the same species. \*,  $0.05 \geq P > 0.01$ ; \*\*,  $0.01 \geq P > 0.001$ ; \*\*\*,  
506  $0.001 \geq P > 0.0001$ ; \*\*\*\*,  $P \leq 0.0001$ .

507 **Figure 4. Mammalian species with dominantly pro-viral ANP32B, but not ANP32A proteins,**  
508 **are associated with E627K.**

509 Mammalian adaptations seen in avian-origin viruses during (A) zoonotic or likely dead-end  
510 cross-species infections/mouse passage experiments (middle panel only) and (B) stable  
511 circulation and prolonged adaption to a mammalian host. Human and swine cross-species  
512 infections (A, left and right panel) were calculated by downloading all non-H1-3 human/swine  
513 influenza virus strain PB2s from NCBI, performing an alignment, curating out any seasonal  
514 human influenza segments and looking at the identities of position 591, 627 and 701. Mouse  
515 adaptation studies (A, middle panel) were calculated by performing a literature review of any  
516 influenza mouse adaptation studies using avian-origin influenza virus without any prior  
517 mammalian adaptation. Only virus strains with good evidence for being stably circulating in  
518 their respective mammalian species were included in the timeline (B). \*swine H9N2 was  
519 included as the phylogenetic and molecular evidence was strong that, although this virus does

520 appear to potentially co-circulate in both swine and chickens, the virus does appear to show  
521 some clear mammalian adaptation markers.

522 **Figure 5. Experimental evolution of an avian influenza virus in human cells abrogated for**  
523 **ANP32B does not lead to the PB2-E627K adaptation.**

524 Sequencing summary of avian origin 50-92 (A, C) or Anhui (B, D) in human cells (A, B) ablated  
525 for ANP32A or ANP32B or (C, D) WT human and swine cells. Each pie chart indicates 6  
526 independently passaged populations, depth of colour indicates rough estimation of the  
527 proportion of the population – light shades indicate a mixed population of WT and indicated  
528 residues at the position while darker shades indicate a complete change. Striped bars indicate  
529 mix of both E627K and D701N. Grey slices indicate no changes are detectible at positions 591,  
530 627 or 701.

531 **Figure 6. Differences in the LCAR of human ANP32A and ANP32B are responsible for the**  
532 **preference of PB2-E627K viruses for ANP32B.**

533 (A) Non-aligned comparison of human ANP32A and ANP32B sequences indicating sites of  
534 interest in yellow and blue.

535 (B) Minigenome assays performed in human eHAP dKO cells with avian 50-92 or Bavaria  
536 polymerase with different mammalian adaptations transfected in along with different  
537 chimeric human ANP32 protein. Data throughout indicates triplicate repeats plotted as the  
538 mean and standard deviation. Statistical significance was determined by one-way ANOVA with  
539 multiple comparisons, statistical tests without comparison bars indicate a comparison against  
540 empty vector and between the different ANP32 proteins. \*\*\*\*,  $P \leq 0.0001$ .

541 (C) Western blot of chimeric human ANP32 proteins used in part (B).

542 **Figure 7. Model of how ANP32 protein dominance in different species may drive**  
543 **mammalian adaptation.**

544 Summary model of the data from this study showing how avian-origin influenza viruses adapt  
545 to the dominant pro-viral ANP32 protein in a new host and gain different adaptive mutation  
546 in PB2. Size of circles in each host indicate the relative pro-viral ability of those ANP32  
547 proteins.

548

549 **Supplementary figure legends**

550 **Figure S1. Extended version of Figure 1.**

551 Minigenome assays performed in (A) human eHAP dKO cells or (B) chicken DF-1 AKO cells  
552 with avian 50-92 polymerase with different mammalian adaptations transfected in along with  
553 different avian or mammalian ANP32 proteins, or empty vector. Data throughout indicates  
554 triplicate repeats plotted as the mean and standard deviation. Statistical significance was  
555 determined by one-way ANOVA with multiple comparisons against WT on log-transformed  
556 data. Lognormality of data was confirmed by Shapiro-Wilk test of normality. \*,  $0.05 \geq P > 0.01$ ;  
557 \*\*,  $0.01 \geq P > 0.001$ ; \*\*\*,  $0.001 \geq P > 0.0001$ ; \*\*\*\*,  $P \leq 0.0001$ .

558 **Figure S2. Different mammalian naturally species have ANP32 proteins which are more, or**  
559 **less supportive of influenza virus polymerase**

560 Minigenome assays performed in human eHAP dKO cells with different mammalian  
561 polymerases, co-transfected with different mammalian ANP32 proteins expressed (A),  
562 different ratios of human ANP32A and B expressed (C). Data throughout indicates triplicate  
563 repeats plotted as the mean and standard deviation. Statistical significance was determined



564 by multiple T-tests between different species ANP32A and ANP32B proteins. \*,  $0.05 \geq P >$   
565  $0.01$ ; \*\*,  $0.01 \geq P > 0.001$ ; \*\*\*,  $0.001 \geq P > 0.0001$ ; \*\*\*\*,  $P \leq 0.0001$ .

566 (B) Western blot analysis of mutant ANP32 proteins tested in part (A).

567 **Figure S3. Canine ANP32B poorly supports polymerase activity due to a polymorphism at**  
568 **residue 153.**

569 Minigenome assays performed in human eHAP dKO cells with different human or dog ANP32B  
570 mutants (A). Data throughout indicates triplicate repeats plotted as the mean and standard  
571 deviation. Statistical significance was determined by one-way ANOVA with multiple  
572 comparisons, statistical tests performed between WT and mutant ANP32 proteins. \*,  $0.05 \geq$   
573  $P > 0.01$ ; \*\*,  $0.01 \geq P > 0.001$ ; \*\*\*,  $0.001 \geq P > 0.0001$ ; \*\*\*\*,  $P \leq 0.0001$ .

574 (B) Western blot analysis of mutant ANP32 proteins tested in part (A).

575 (C) Phylogenetic analysis of avian and mammalian ANP32B proteins. Species which contain  
576 the weakly proviral signature, 153R shown in red, species with 156Q shown in black, species  
577 with 153G shown in cyan. Phylogenetic trees made using the neighbour-joining method based  
578 on amino acid sequence.

579 **Figure S4. PB2-E627K is more strongly supported by ANP32B across a wide range of plasmid**  
580 **concentrations.**

581 Minigenome assays performed in human eHAP dKO cells with chicken ANP32A, or human  
582 ANP32A or ANP32B titrated in. Data throughout indicates triplicate repeats plotted as the  
583 mean and standard deviation. Statistical significance was determined by multiple T-tests  
584 between human ANP32A and ANP32B, statistical tests performed between WT and mutant

585 ANP32 proteins. \*,  $0.05 \geq P > 0.01$ ; \*\*,  $0.01 \geq P > 0.001$ ; \*\*\*,  $0.001 \geq P > 0.0001$ ; \*\*\*\*,  $P \leq$   
586 0.0001.

587 **Figure S5. PB2-E627K, but not Q591R or D701N shows a preference for using mammalian**  
588 **ANP32B proteins in DF-1 AKO cells.**

589 Data from Figure 1 and Supplementary Figure S1 shown in a different format. Minigenome  
590 assays performed in avian DF-1 AKO cells with avian 50-92 polymerase with different  
591 mammalian adaptations transfected in along with different avian or mammalian ANP32A  
592 (blue bars) or ANP32B proteins (orange bars). Data throughout indicates triplicate repeats  
593 plotted as the mean and standard deviation, normalised to chicken ANP32A. Statistical  
594 significance was determined by one-way ANOVA with multiple comparisons, statistical tests  
595 without comparison bars indicate a comparison against empty vector and between ANP32A  
596 and ANP32B proteins from the same species. \*,  $0.05 \geq P > 0.01$ ; \*\*,  $0.01 \geq P > 0.001$ ; \*\*\*,  
597  $0.001 \geq P > 0.0001$ ; \*\*\*\*,  $P \leq 0.0001$ .

**Figure 1. PB2-Q591R, -E627K/V and D701N increase avian influenza virus polymerase activity in a mammalian cell specific manner**

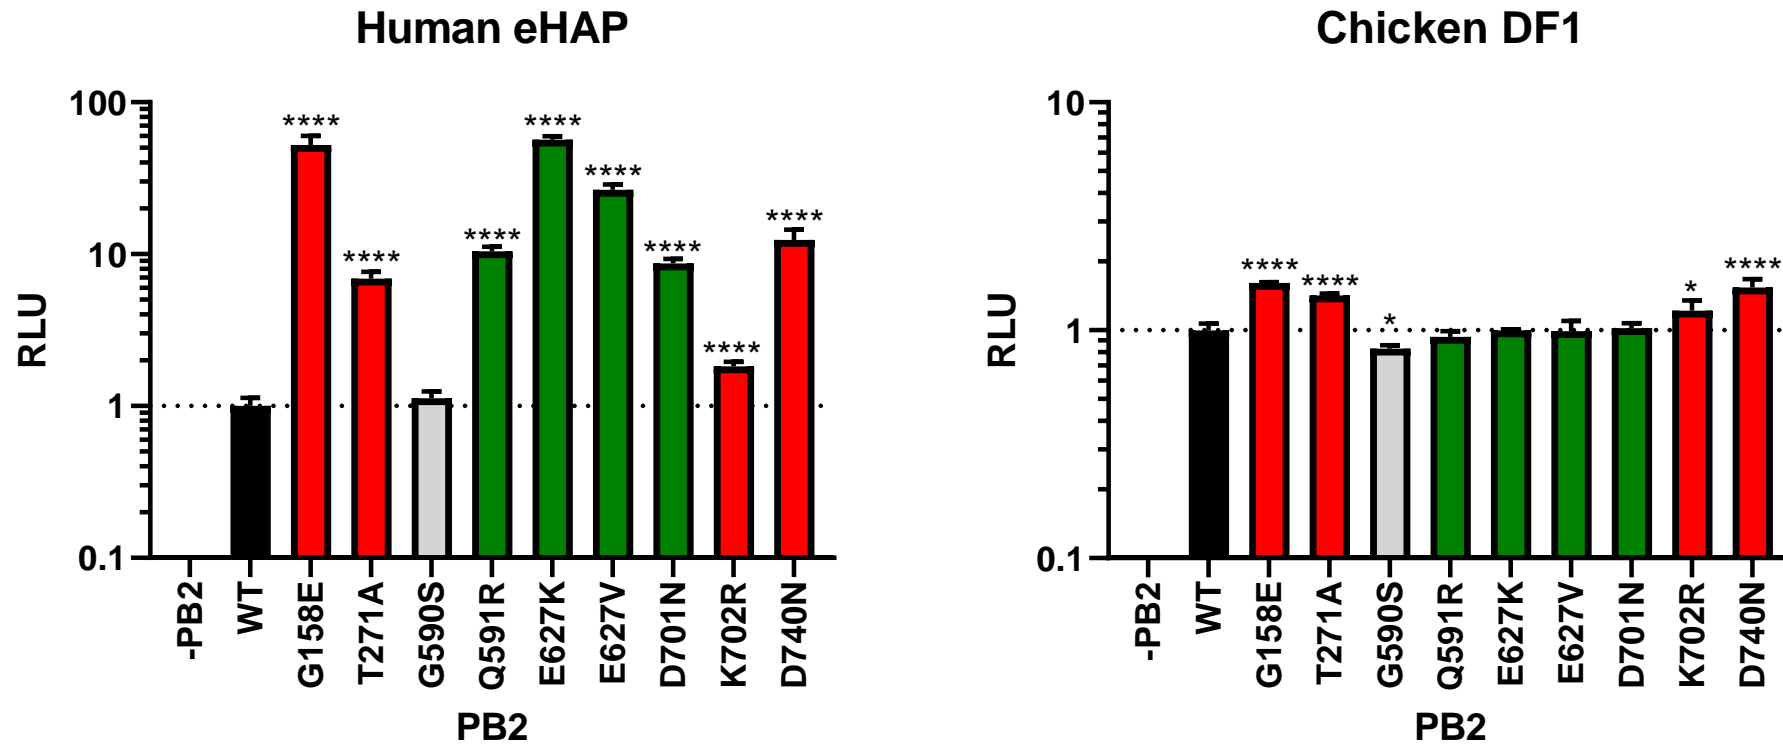

Figure 2. PB2-Q591R, -E627K and -D701N specifically adapt influenza virus polymerase to human ANP32 proteins.

A

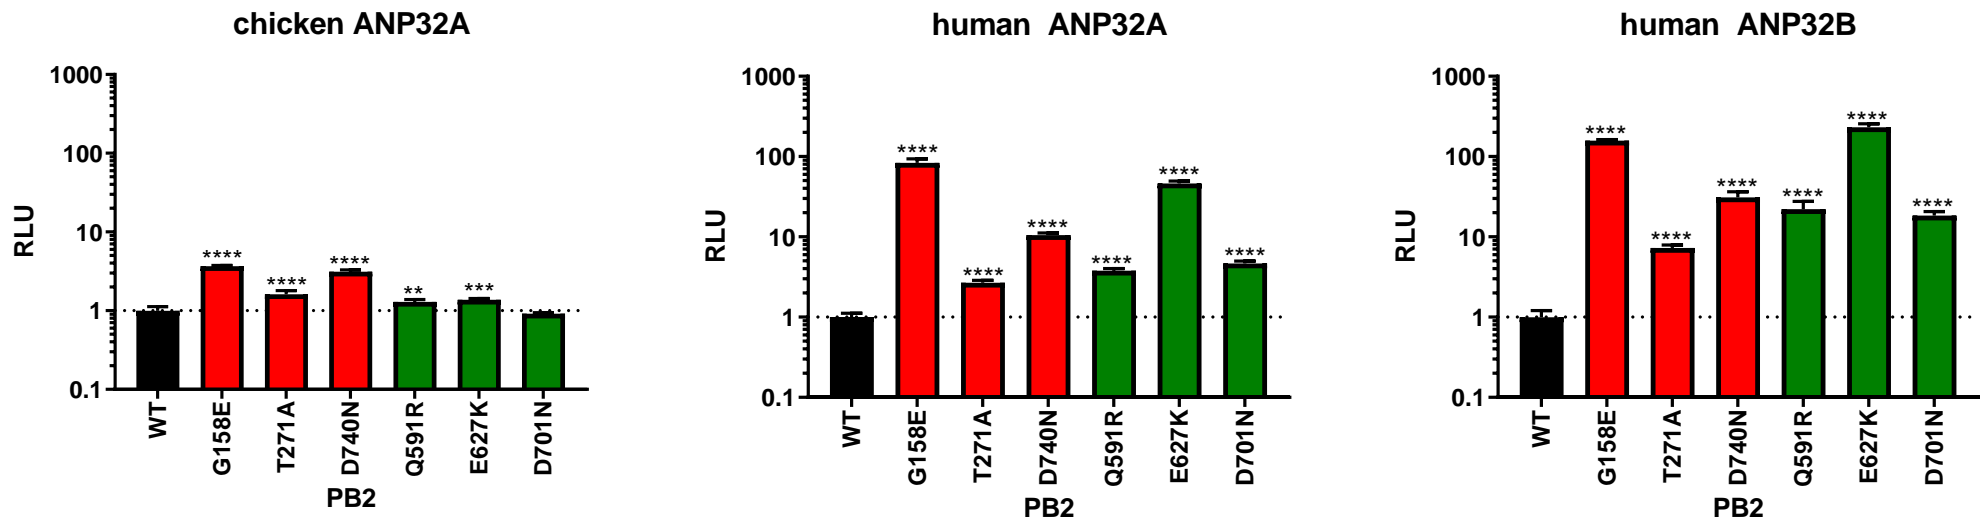

B

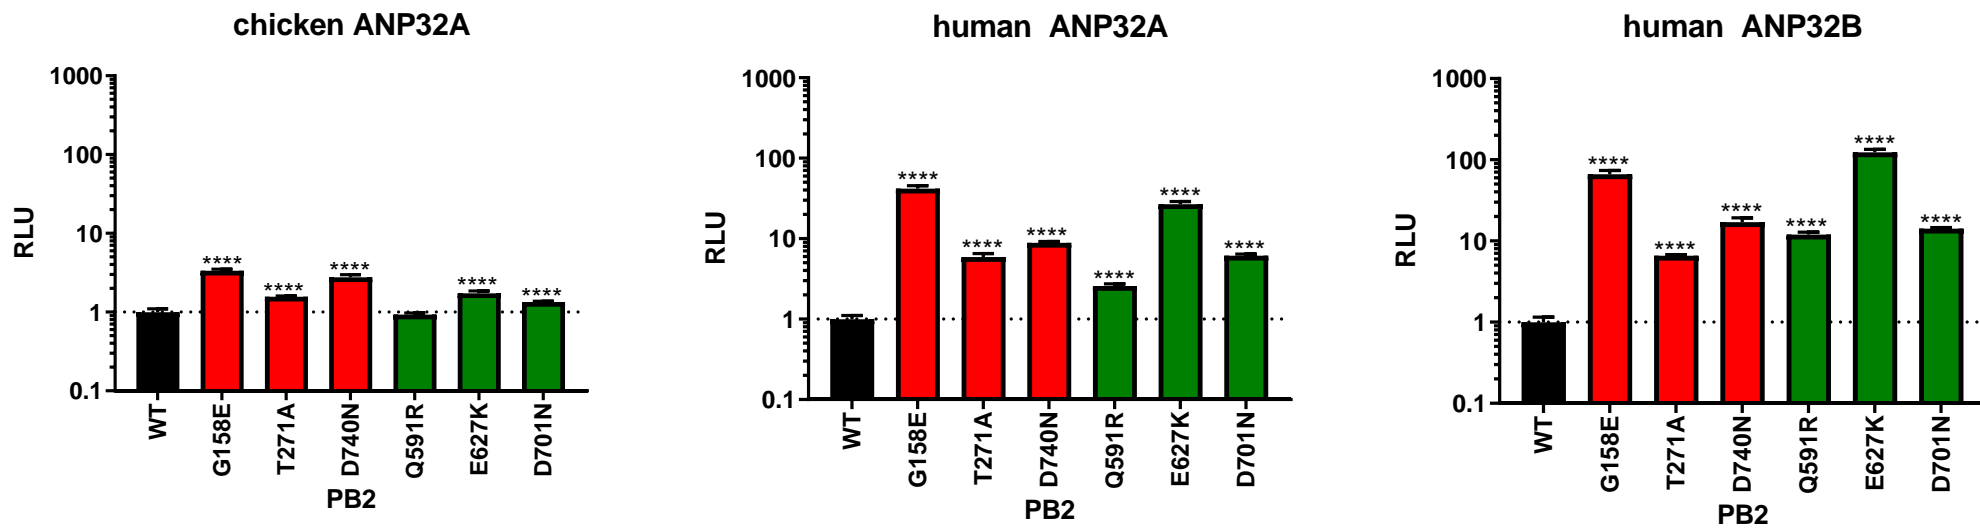

**Figure 3. PB2-E627K shows a greater preference than -Q591R or -D701N for using mammalian ANP32B proteins.**

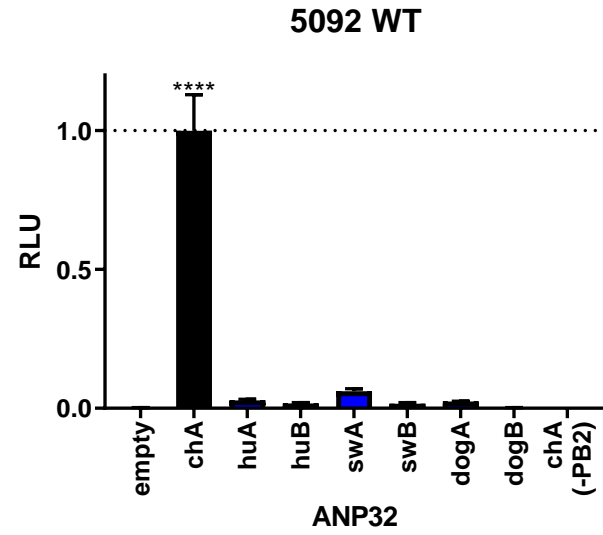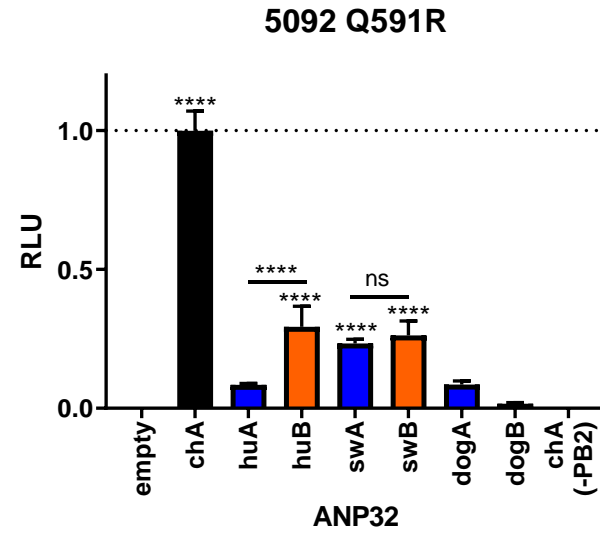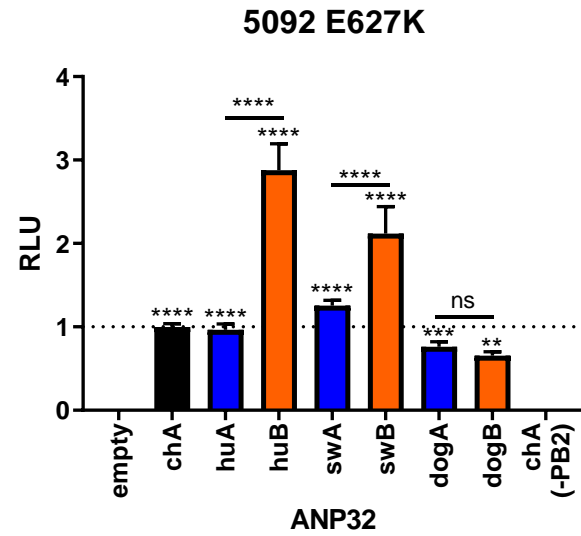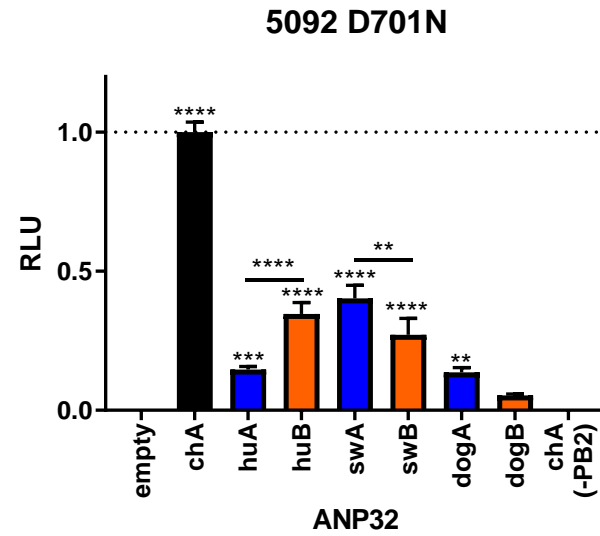

**Figure 4. Mammalian species with dominantly pro-viral ANP32B, but not ANP32A proteins, are associated with E627K.**

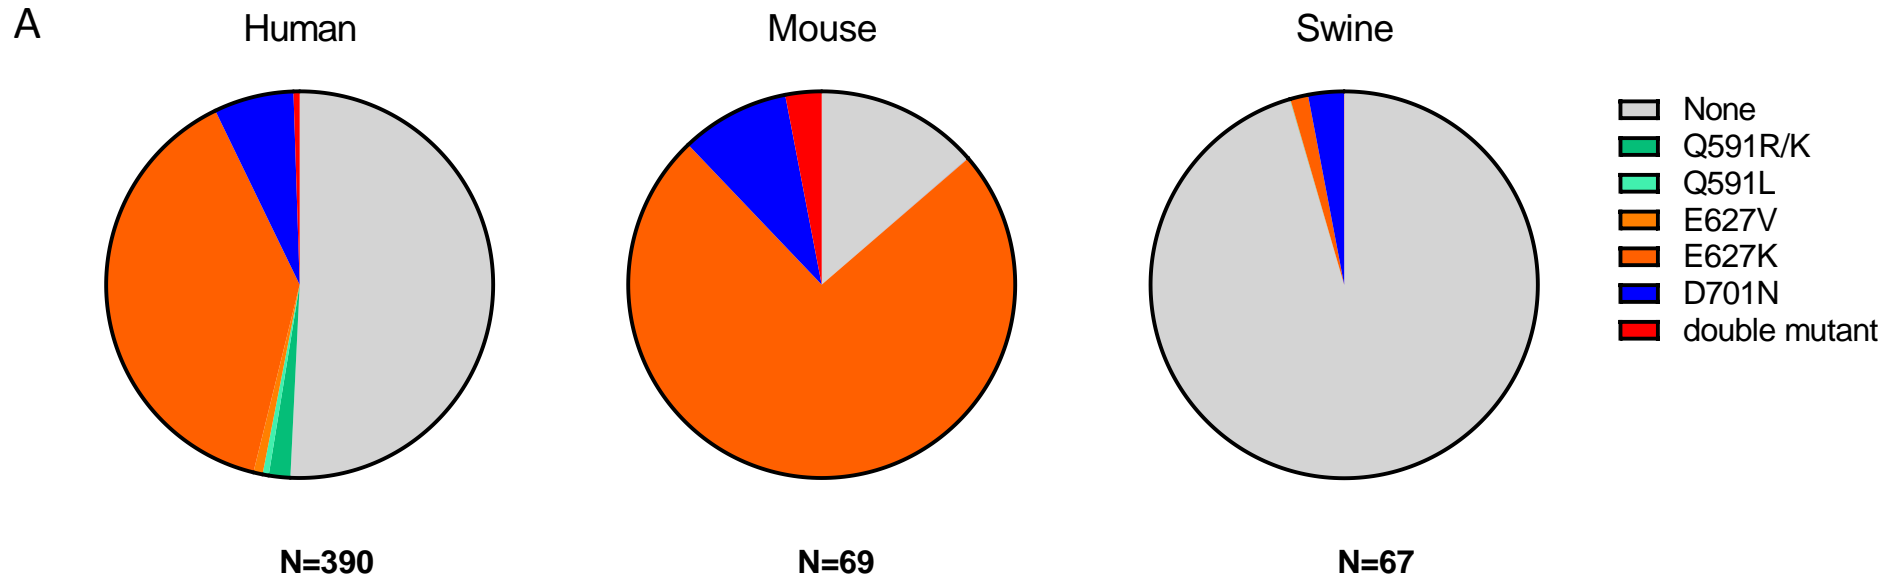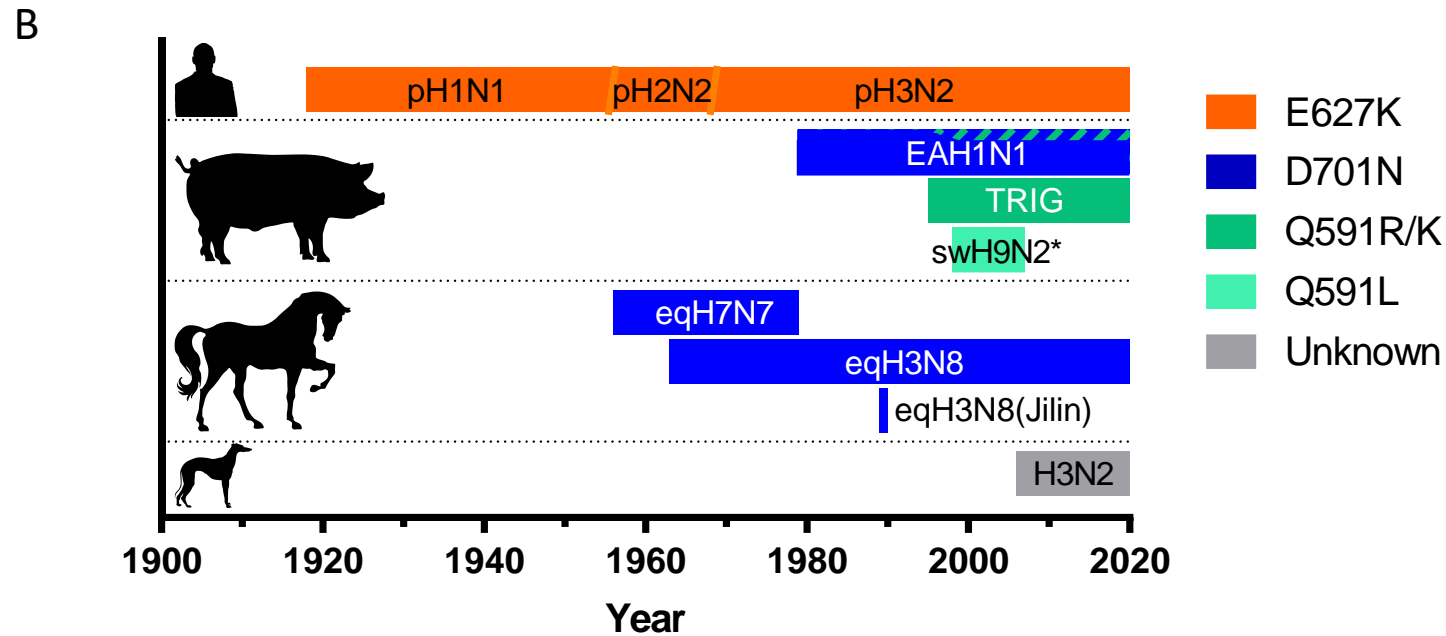

**Figure 5. Experimental evolution of an avian influenza virus in human cells abrogated for ANP32B does not lead to the PB2-E627K adaptation.**

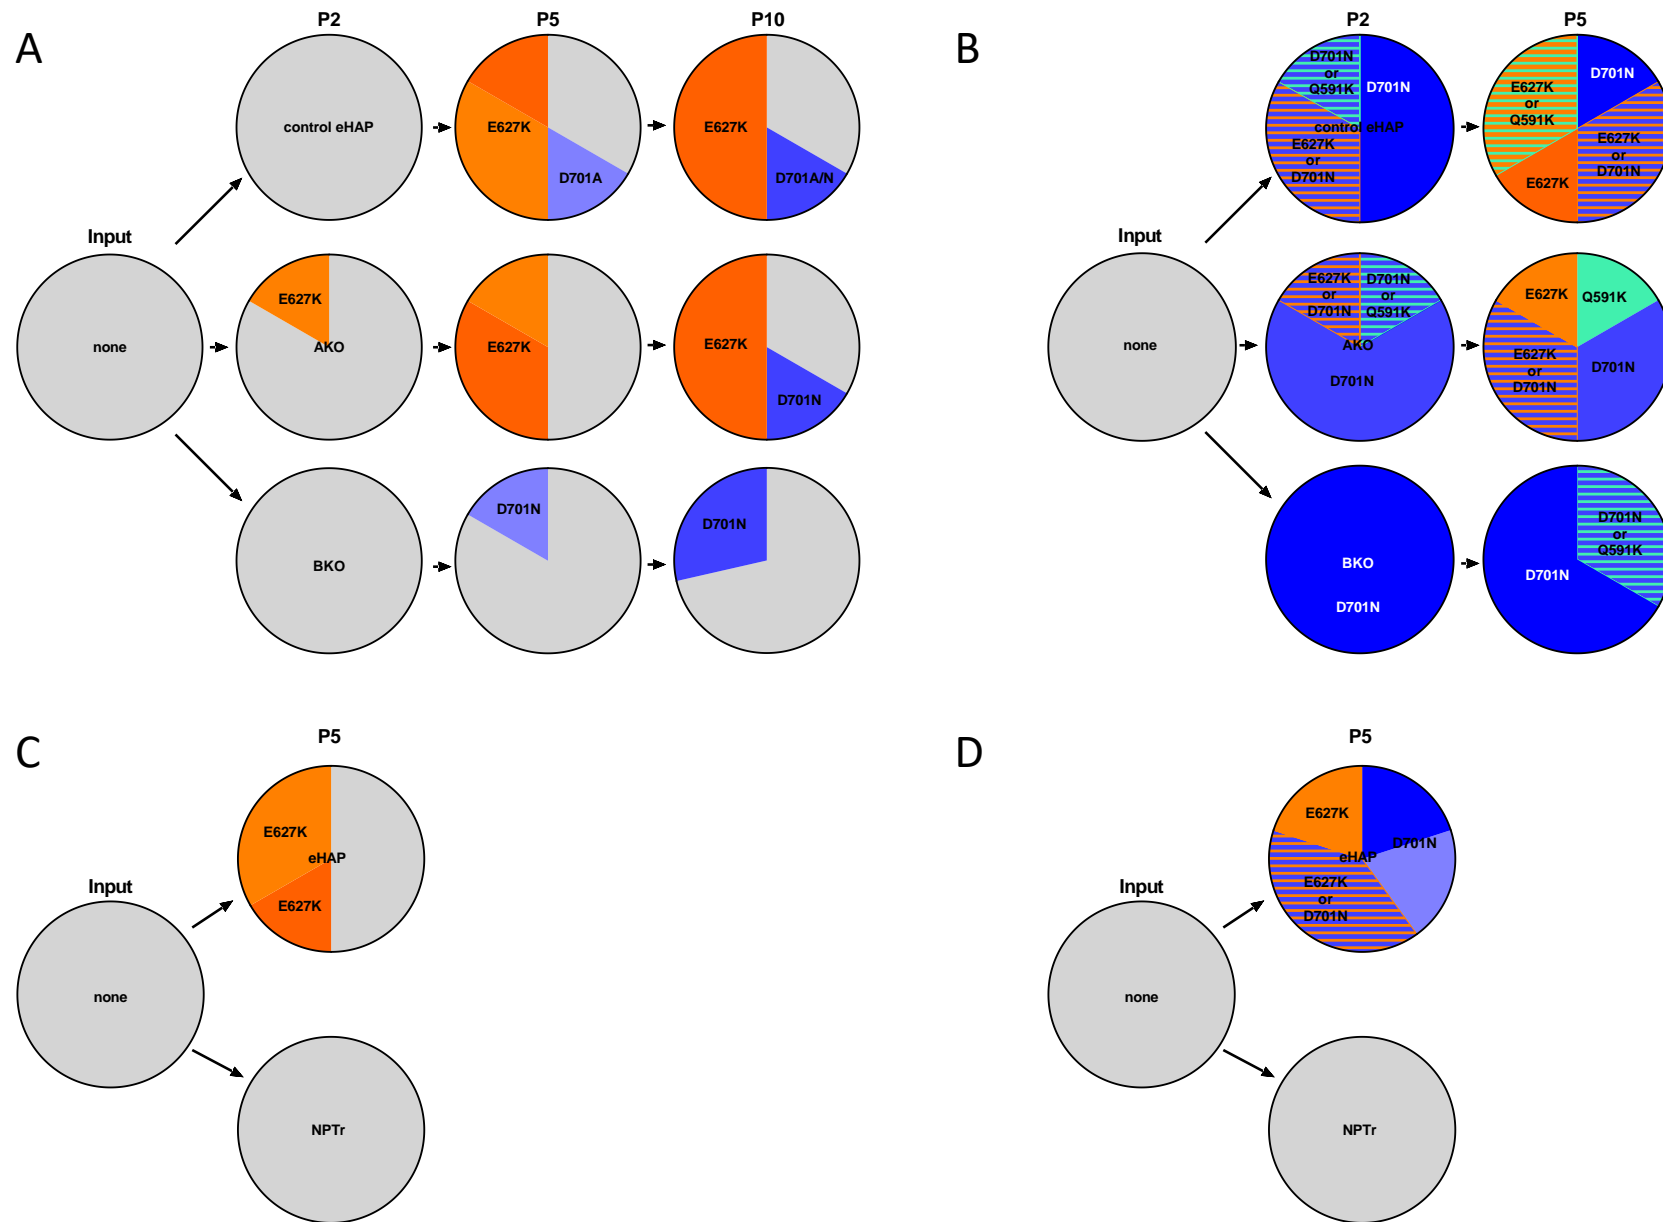

**Figure 6. Differences in the LCAR of human ANP32A and ANP32B are responsible for the preference of PB2-E627K viruses for ANP32B.**

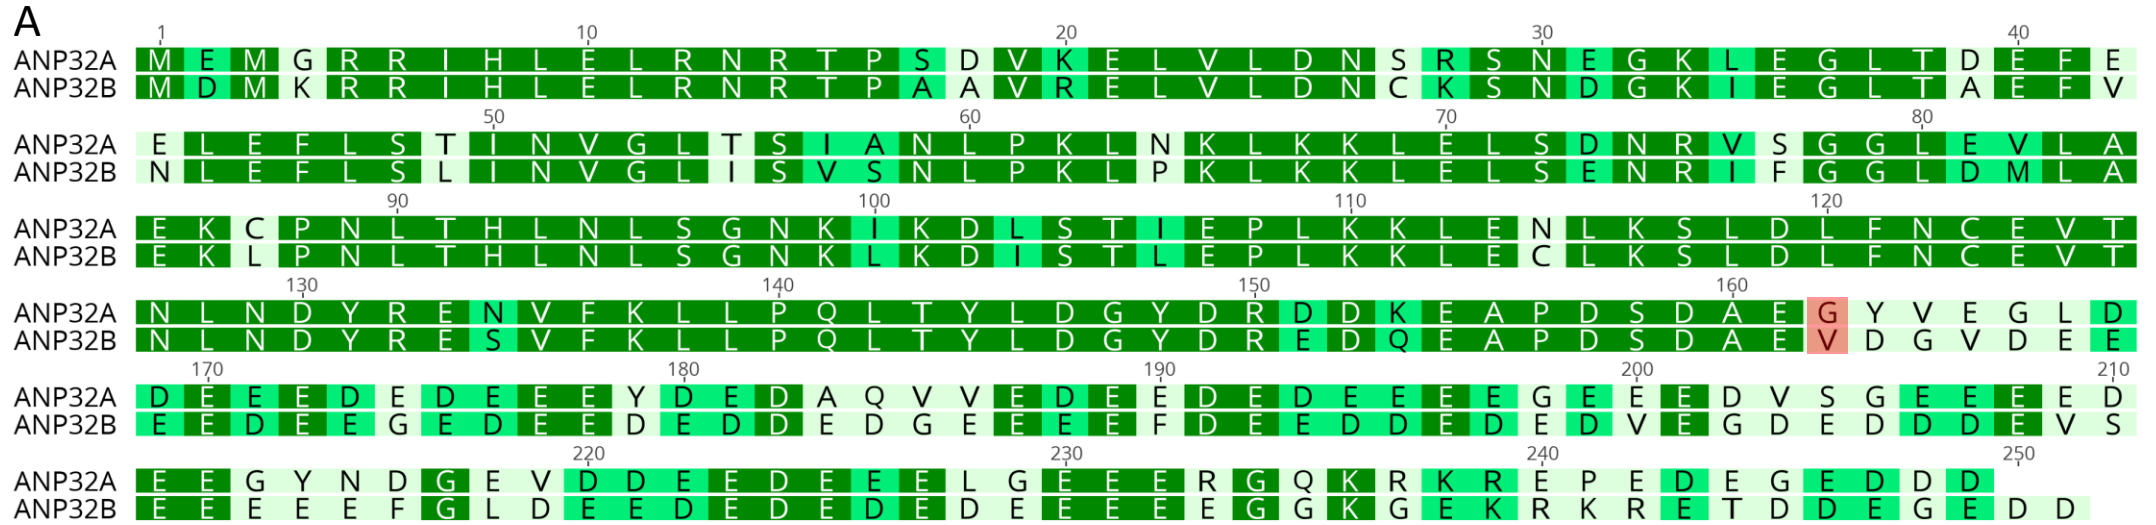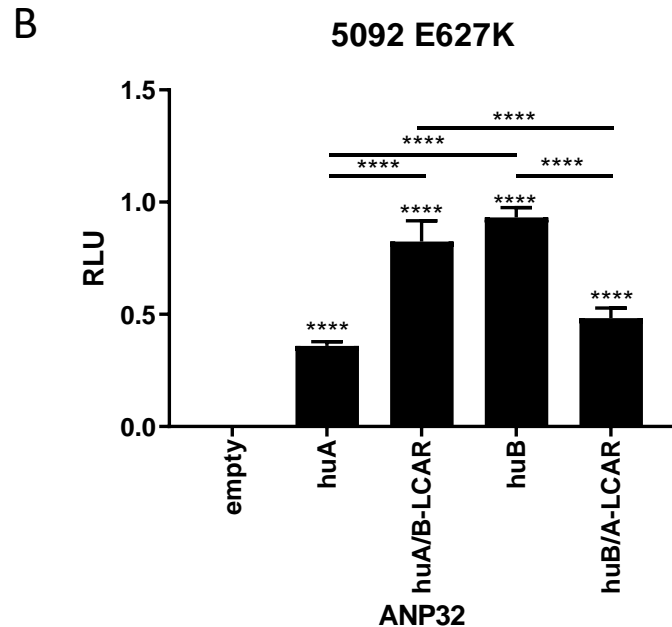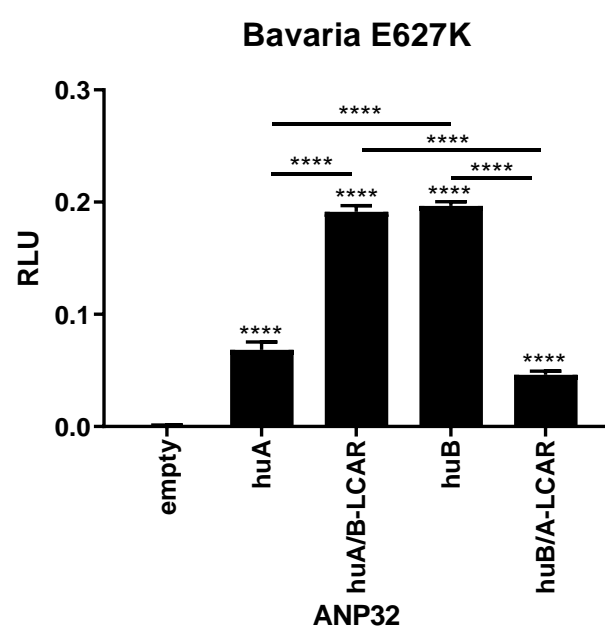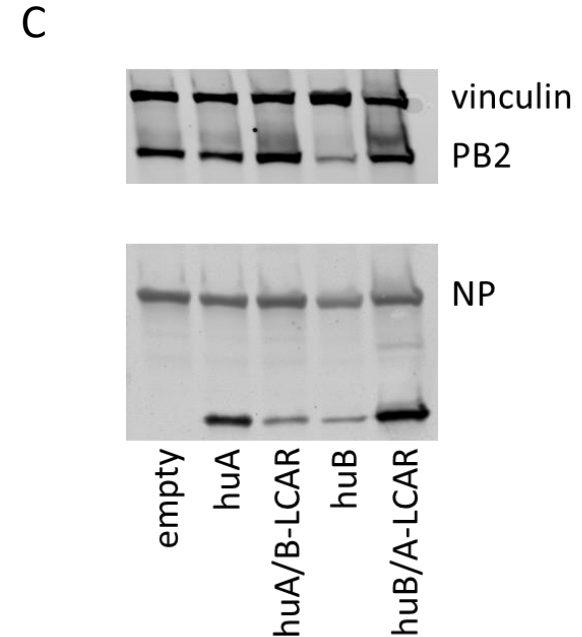



Figure 7. Model of how ANP32 protein dominance in different species may drive mammalian adaptation.

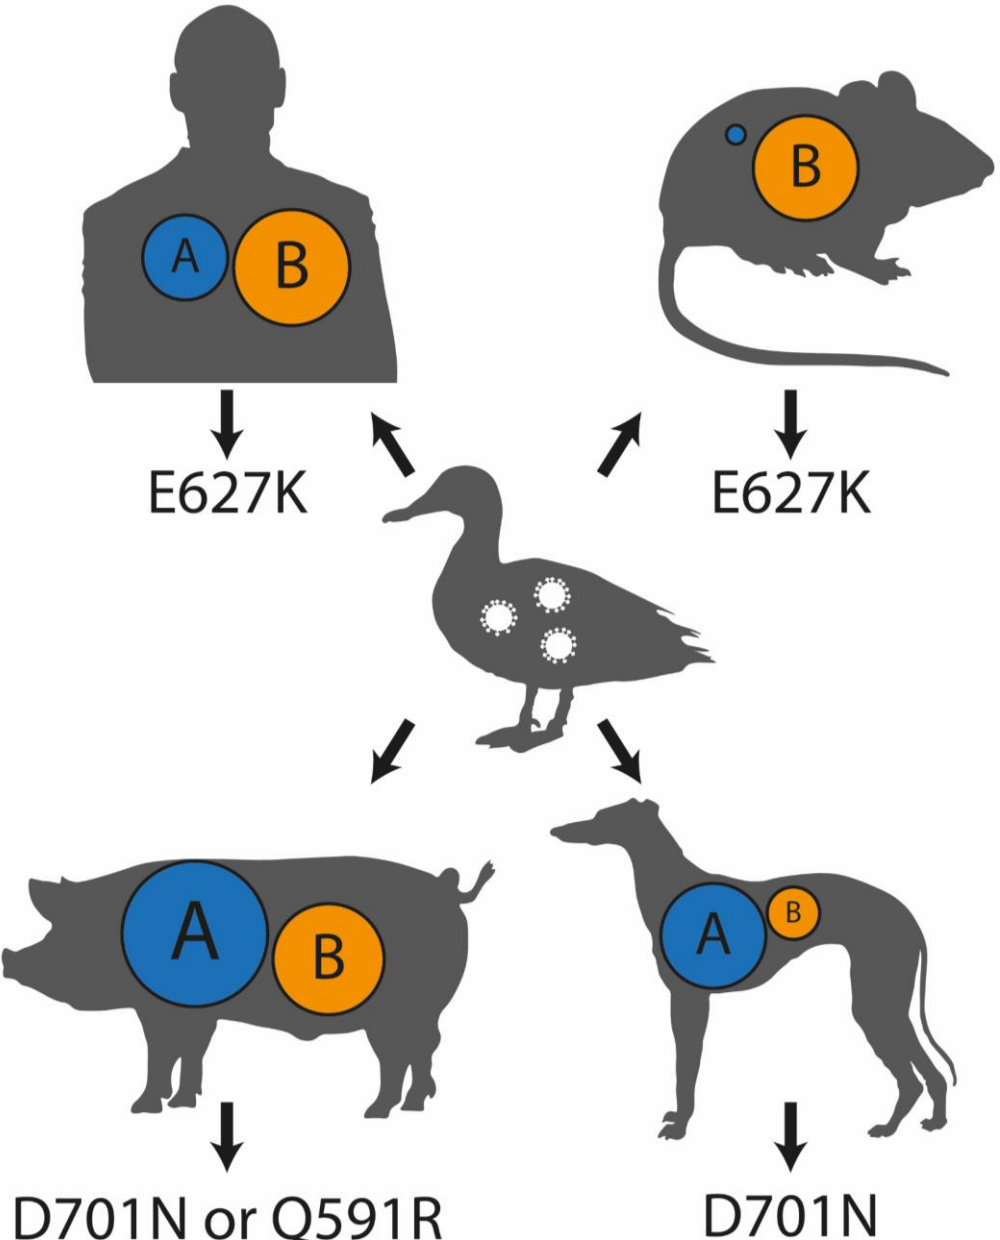

**Figure S1. Extended version of Figure 2.**

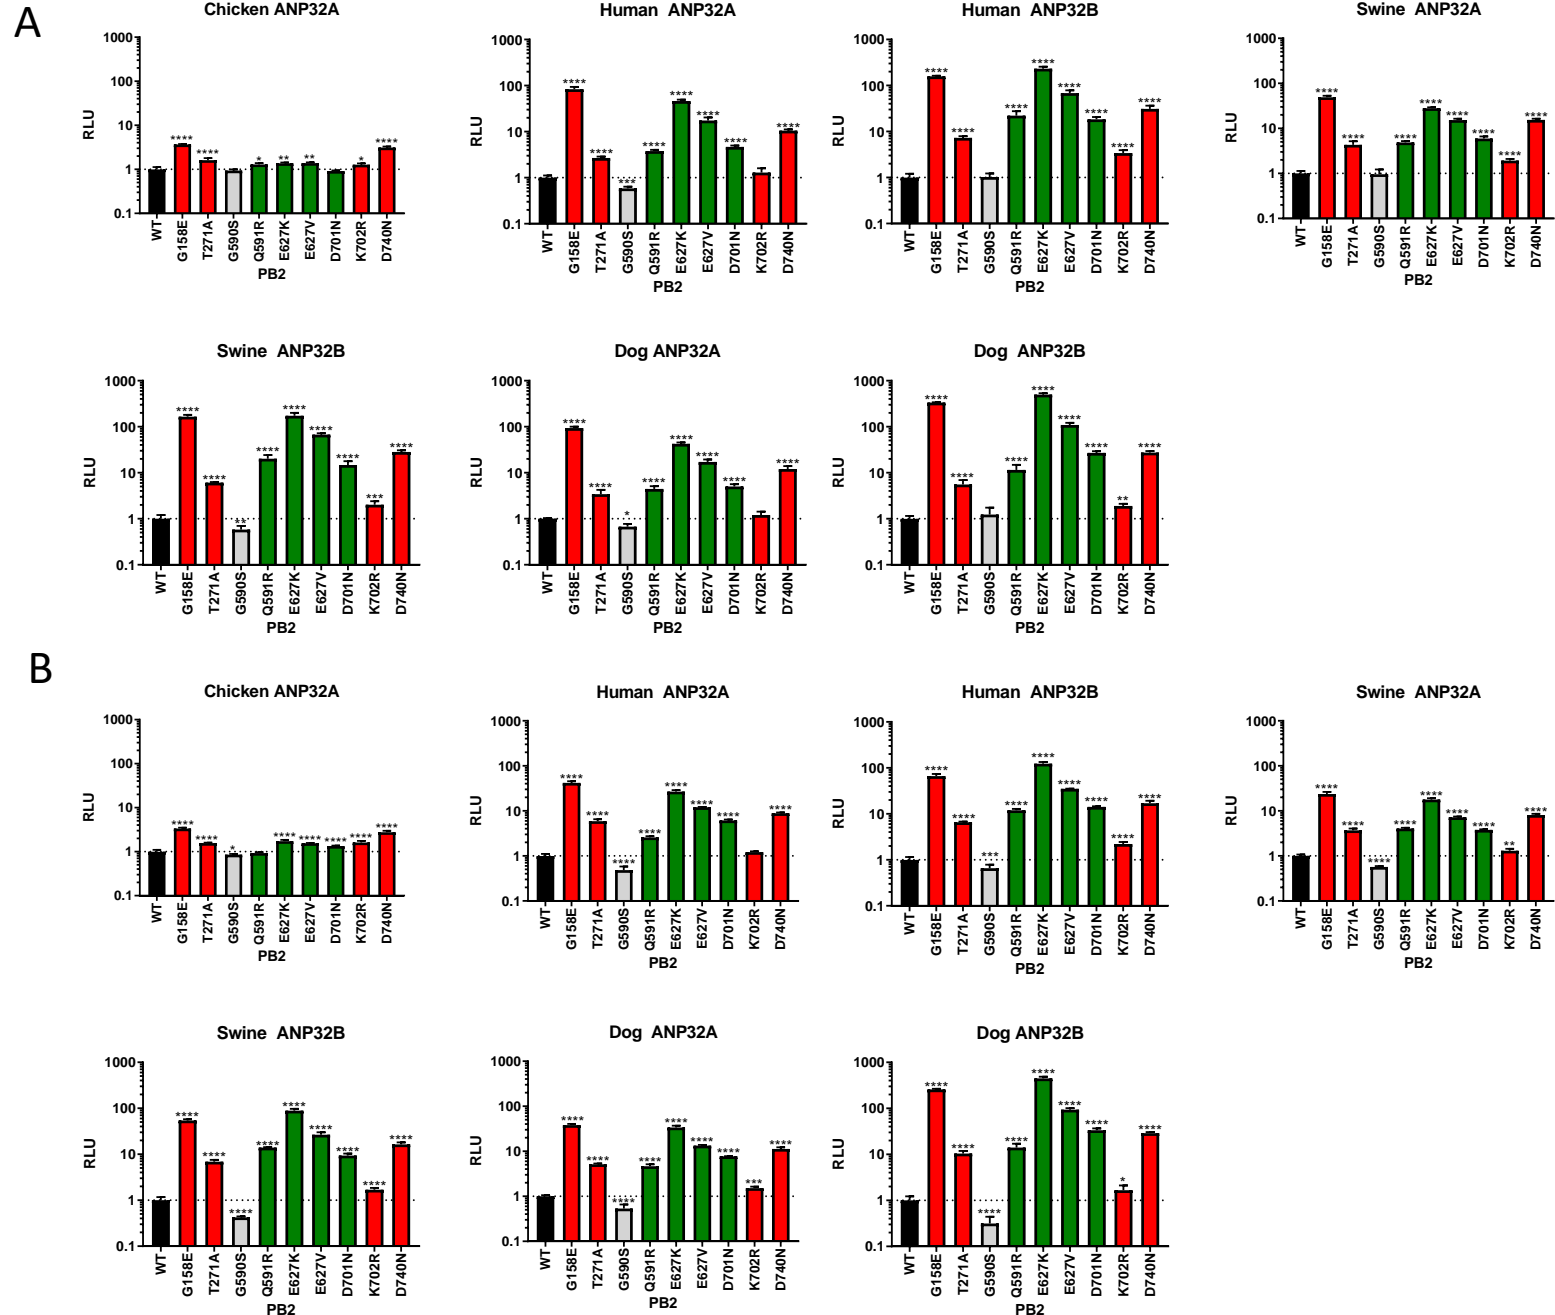

**Figure S2. Different mammalian naturally species have ANP32 proteins which are more or less supportive of influenza virus polymerase**

**A**

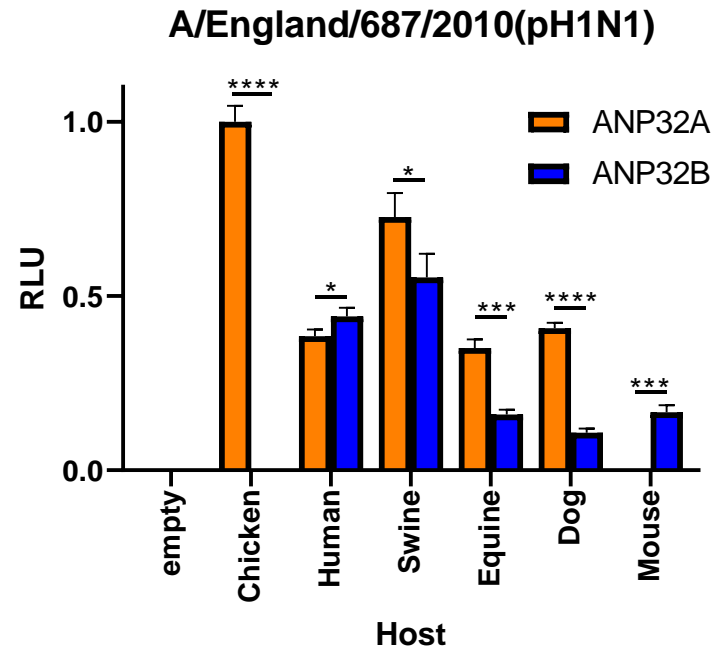

**B**

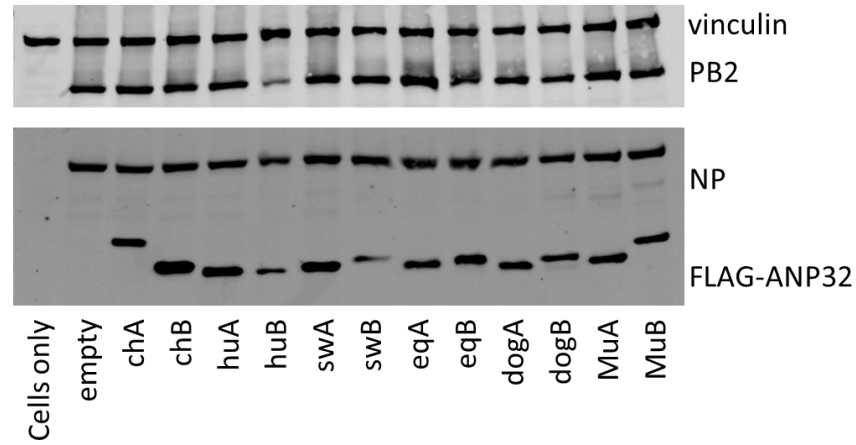

**C**

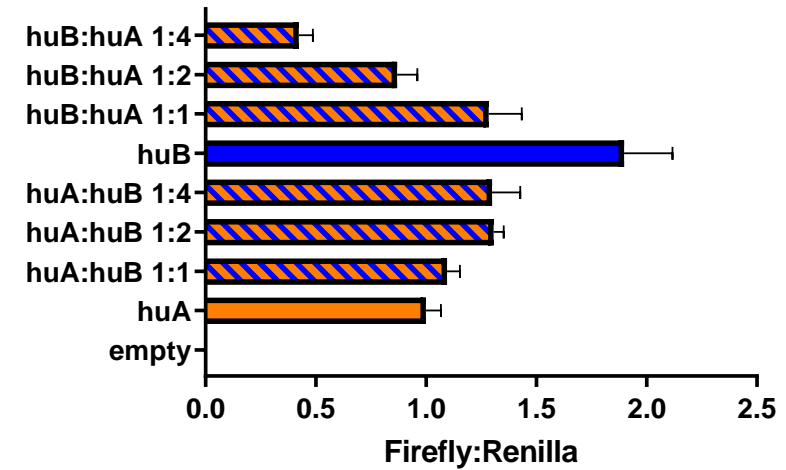

**Figure S3. Canine ANP32B poorly supports polymerase activity due to a polymorphism at residue 153**

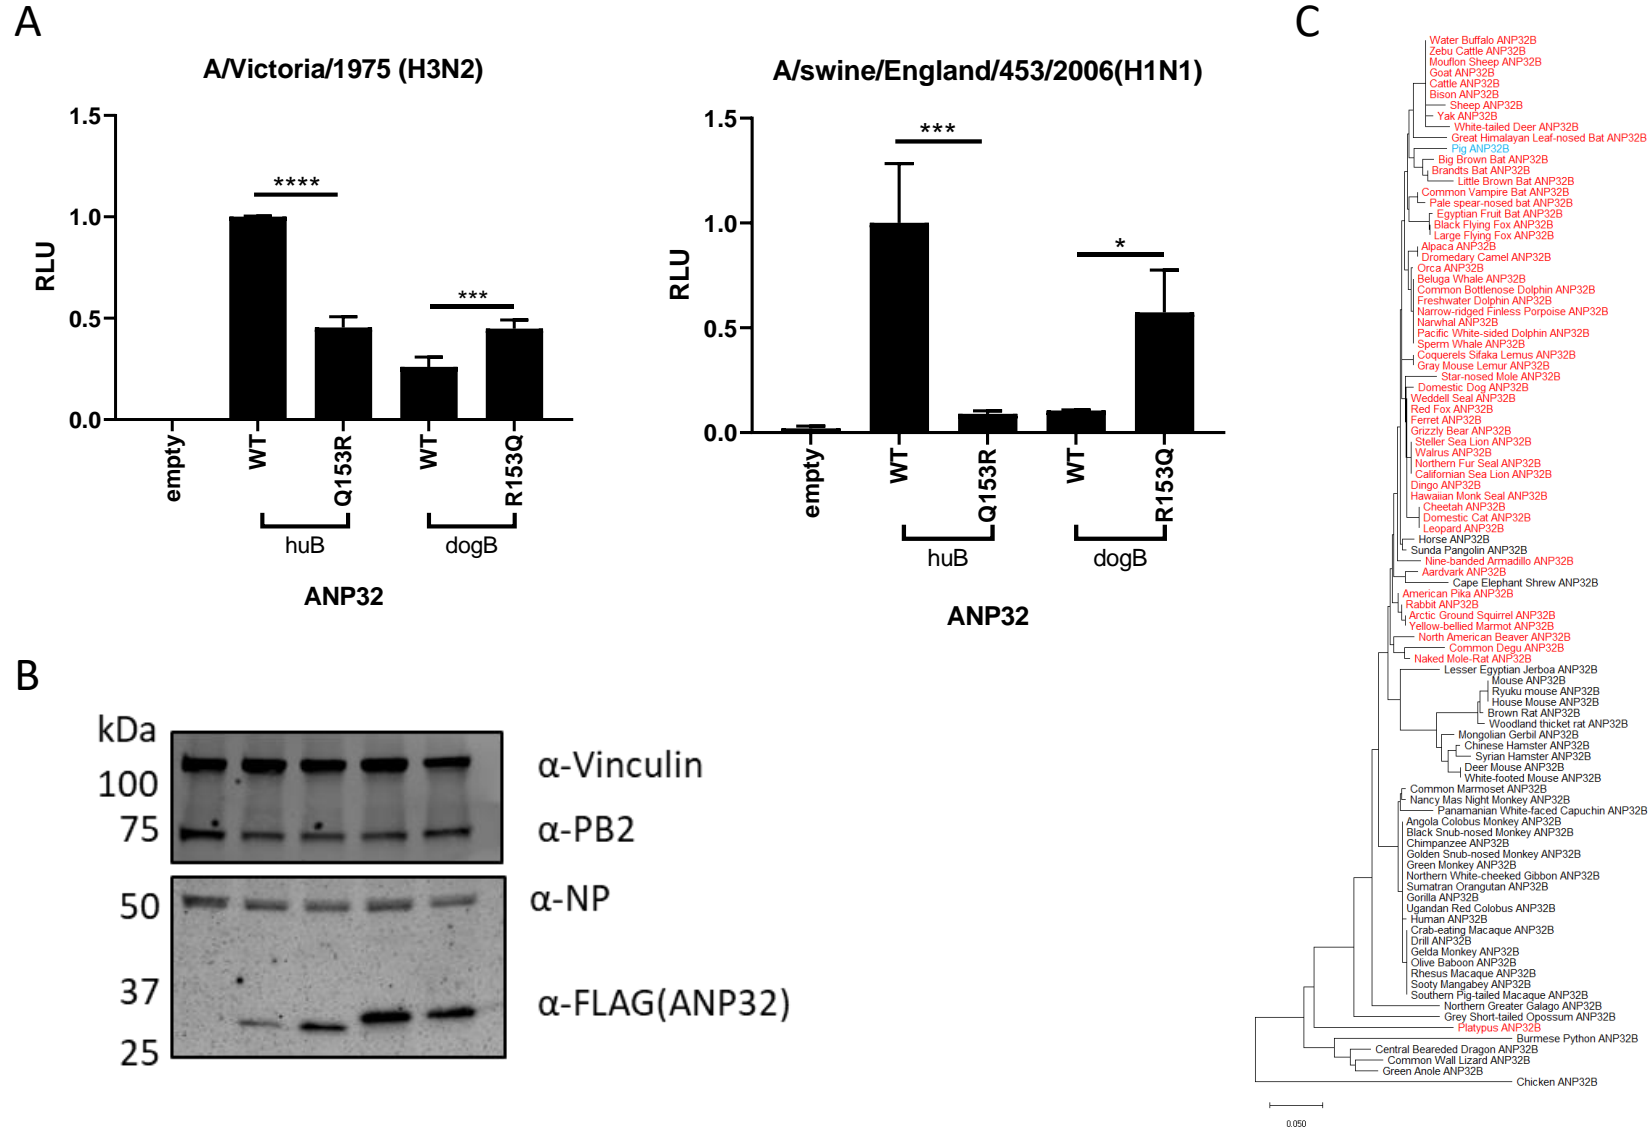

Figure S4. PB2-E627K is more strongly supported by ANP32B across a wide range of plasmid concentrations

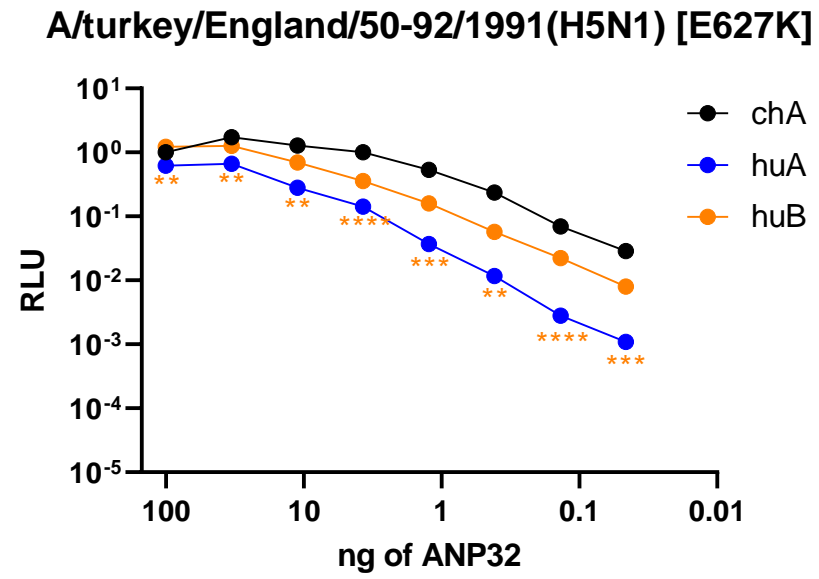

Figure S5. PB2-E627K, but not D701N shows a preference for using mammalian ANP32B proteins in DF-1 AKO cells.

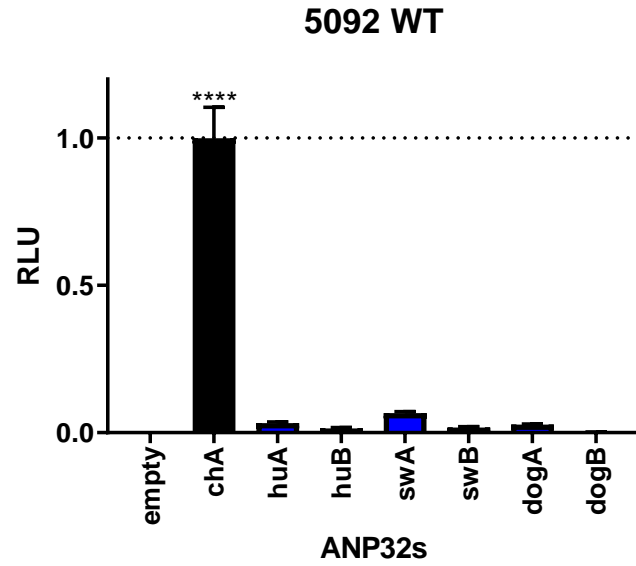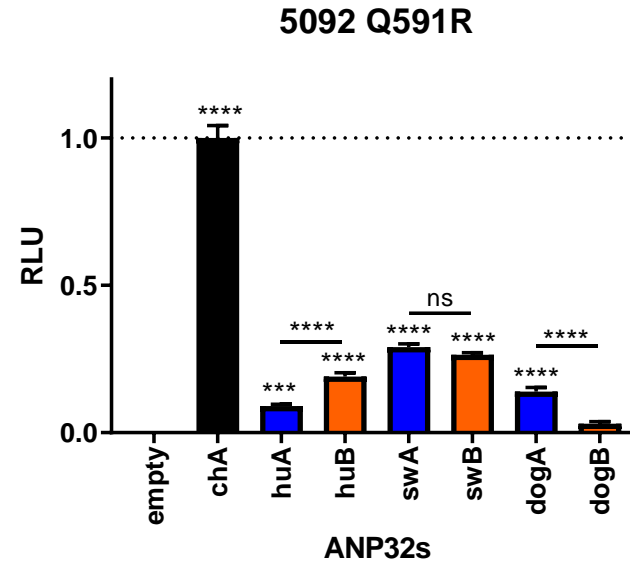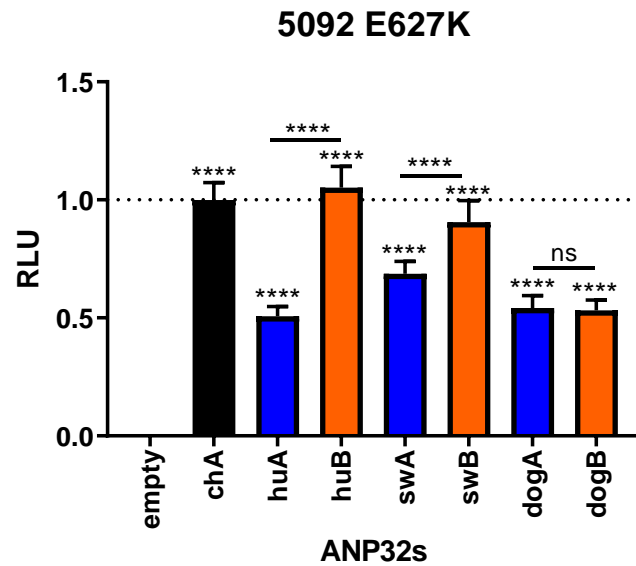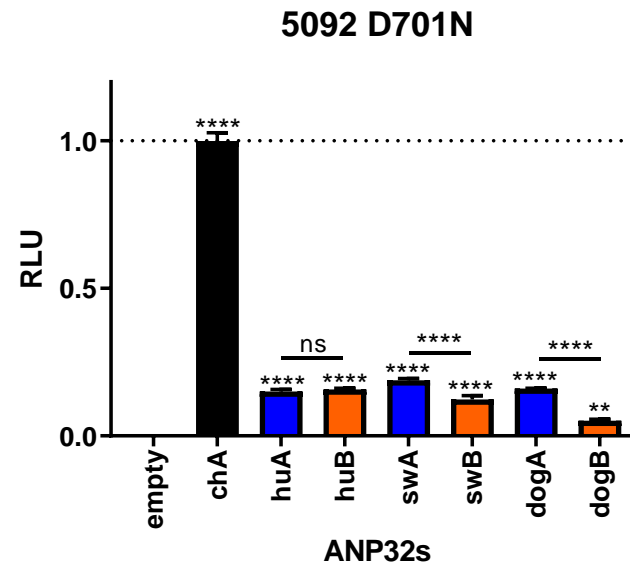

Source: https://www.biorxiv.org/content/10.1101/2020.09.03.282384v1.full.pdf
